# Supplementary material for: Adjuvant-dependent impact of inactivated SARS-CoV-2 vaccines during heterologous infection by a SARS-related coronavirus
Source: PubMed Central journal article supplement (PMC11068739; doi:10.1038/s41467-024-47450-x), 2024-05-03
Supplement: 41467_2024_47450_MOESM1_ESM.pdf [file 41467_2024_47450_MOESM1_ESM.pdf]

**Adjuvant-dependent impact of inactivated SARS-CoV-2 vaccines during heterologous infection by a  
SARS-related coronavirus**

**SUPPLEMENTARY INFORMATION**

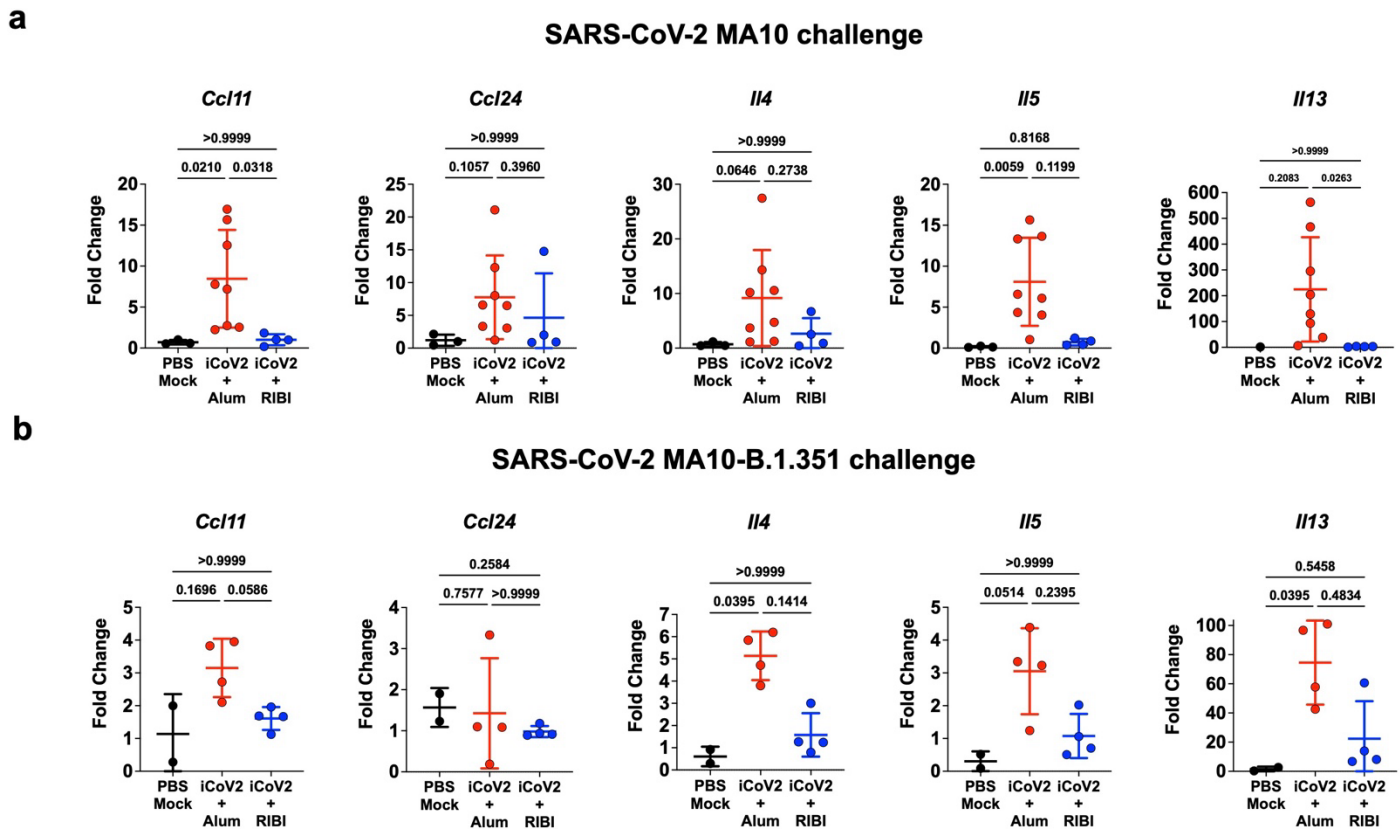

**Supplementary Fig. 1: Type 2 cytokine gene expression during SARS-CoV-2 and B.1.351 infection.**

Mice were mock-vaccinated with PBS or vaccinated with inactivated SARS-CoV-2 formulated with either Alum or RIBI adjuvants and challenged 3 weeks post-boost with either SARS-CoV-2 MA10 or SARS-CoV-2 MA10-B.1.351. Pulmonary tissue specimens were collected at 5 DPI. Expression of type 2 cytokine genes in pulmonary tissue was measured by qRT-PCR. Results reported as fold change normalized to *Gapdh* expression using  $\Delta\Delta Ct$

**a** SARS-CoV-2 MA10 challenge. **b** SARS-CoV-2 MA10-B.1.351 challenge.

Individual data points represent independent biological replicates. Measurements were taken from discrete samples. Analyzed by Kruskal-Wallis test with Dunn's multiple comparisons correction. Solid horizontal lines overlaying data represent group means. Error bars represent group SD. Solid horizontal lines above data represent pairwise comparisons with p-values. Results from 1 animal experiment.

Number of animals used: **(a)** *Ccl11*, *Ccl24*, *Il4*, *Il5* – iFLU + Alum (3), iCoV2 + Alum (8), iCoV2 + RIBI (4); *Il13* – iFLU + Alum (1), iCoV2 + Alum (8), iCoV2 + RIBI (4). **(b)** *Ccl11*, *Ccl24*, *Il4*, *Il5*, *Il13* iFLU + Alum (2), iCoV2 + Alum (4), iCoV2 + RIBI (4).

Alum = aluminum hydroxide adjuvant; *Ccl11* = C-C motif chemokine 11 gene; *Ccl24* = C-C motif chemokine 24 gene; DPI = days post-infection; iCoV2 = inactivated SARS-CoV-2 vaccine; ; *Il4* = Interleukin 4 gene; *Il5* = Interleukin 5 gene; *Il13* = Interleukin 13 gene; MA10 = mouse-adapted SARS-CoV-2; MA10-B.1.351 = MA10 expressing B.1.351 (Beta variant) spike protein; PBS = phosphate-buffered saline; RIBI = Sigma Adjuvant System adjuvant; SD = standard deviation

Source data are provided as a Source Data file.

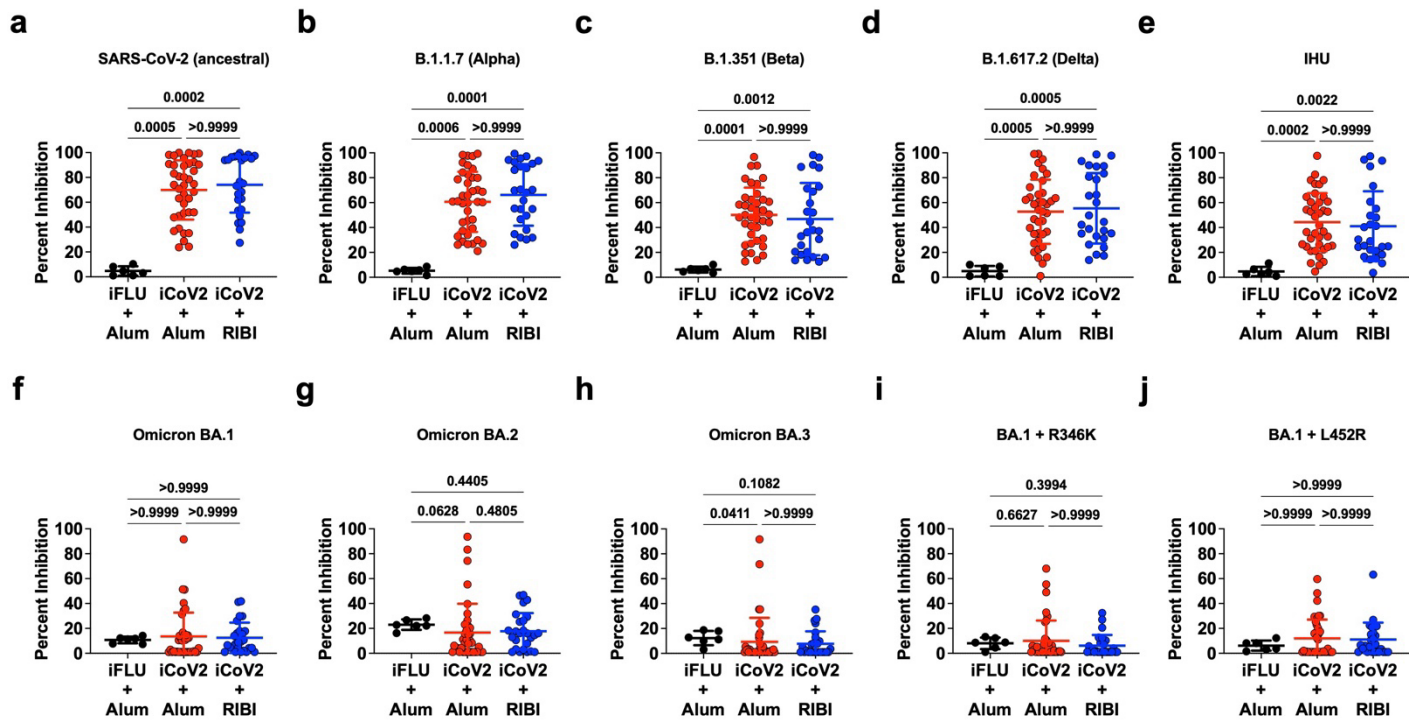

**Supplementary Fig. 2: Vaccine immune serum surrogate neutralization of SARS-CoV-2 spike proteins.**

Serum was collected from mice 3 weeks post-boost vaccination. Serum capacity for inhibition of ACE2 binding to SARS-CoV-2 and variant spike proteins was evaluated using the multiplexed Meso Scale Discovery (MSD) V-PLEX SARS-CoV-2 Panel 25 competition immunoassay as a surrogate neutralization assay.

**a** SARS-CoV-2 (ancestral); **b** SARS-CoV-2 B.1.1.7 (Alpha variant); **c** SARS-CoV-2 B.1.351 (Beta variant); **d** SARS-CoV-2 1.617.2 (Delta variant); **e** SARS-CoV-2 IHU variant; **f** SARS-CoV-2 Omicron BA.1; **g** SARS-CoV-2 BA.2; **h** SARS-CoV-2 BA.3; **i** SARS-CoV-2 BA.1 + R346K; **j** SARS-CoV-2 BA.1 + L452R.

Individual data points represent independent biological replicates. Measurements were taken from discrete samples. Combined results from 2 independent animal experiments (effects reproduced in each experiment). Analyzed by Kruskal-Wallis test with Dunn's multiple comparisons correction. Solid horizontal lines overlaying data represent group means. Error bars represent group SD. Dotted lines represent assay limit of detection. Solid horizontal lines above data represent pairwise comparisons with p-values.

Number of animals used: **(a-j)** iFLU + Alum (6), iCoV2 + Alum (39), iCoV2 + RIBI (26).

ACE2 = Angiotensin-converting enzyme 2; Alum = aluminum hydroxide adjuvant; iCoV2 = inactivated SARS-CoV-2 vaccine; iFLU = inactivated influenza virus vaccine; RIBI = Sigma Adjuvant System adjuvant; SD = standard deviation

Source data are provided as a Source Data file.

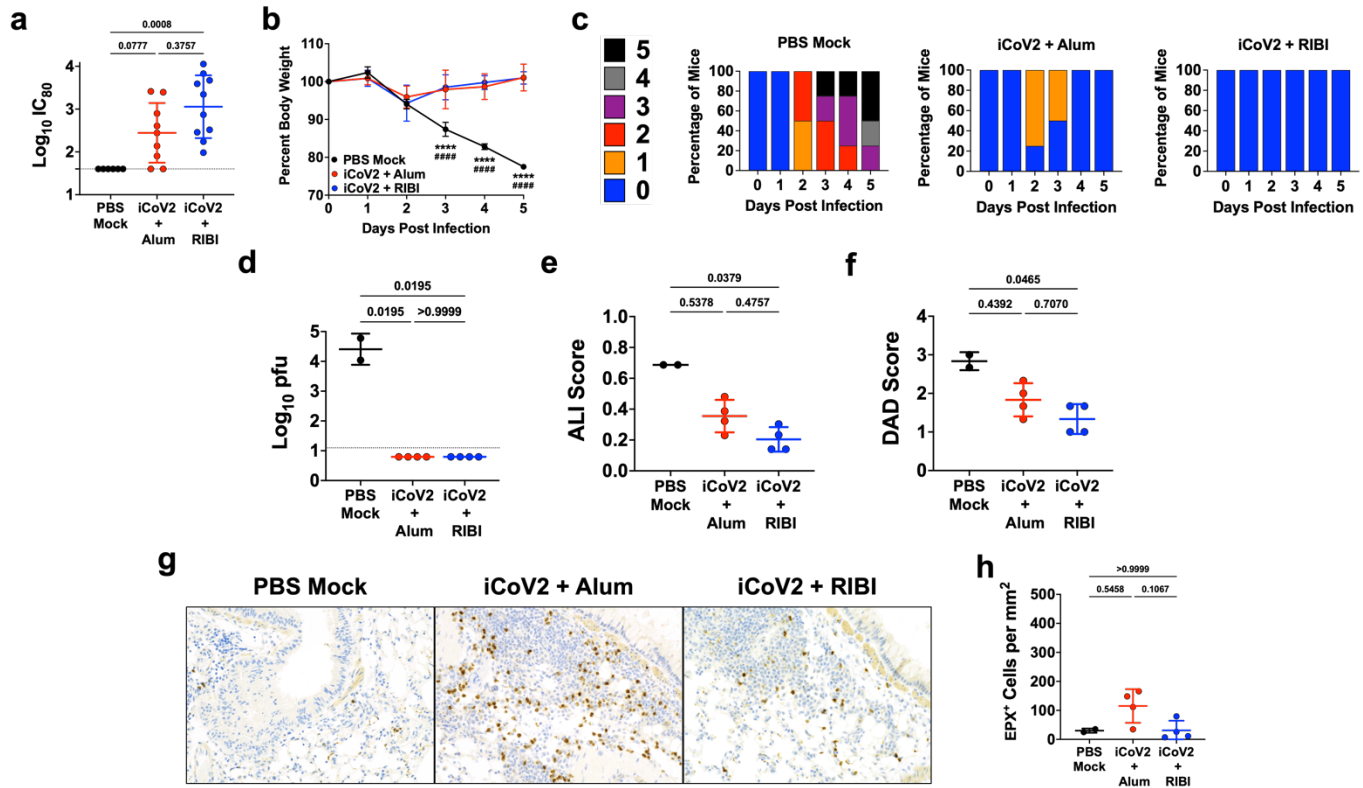

**Supplementary Fig. 3: Safety and efficacy of inactivated SARS-CoV-2 vaccine against B.1.351.**

Mice were either mock-vaccinated with PBS (PBS Mock) or vaccinated with inactivated SARS-CoV-2 plus aluminum hydroxide (Alum) or Sigma Adjuvant System adjuvant (RIBI) adjuvants and challenged 4 weeks post-boost with SARS-CoV-2 MA10-B.1.351. Pulmonary tissue was collected at 5 DPI.

**a** Post-boost serum samples were collected prior to challenge and neutralizing antibody titers against SARS-CoV-2 (B.1.351-S) were measured using a luminescence-based microneutralization assay;  $IC_{80}$  = 80% inhibitory concentration **b,c** Body weights (**b**) and clinical scores (**c**) were measured daily. **d** Pulmonary viral titers were quantified by plaque assay; pfu = plaque forming unit. **e, f** H&E-stained pulmonary specimens were analyzed to evaluate ALI (**e**) and DAD (**f**). **g, h** Representative photomicrographs (**g**) (magnification = 200X) and quantification (**h**) of pulmonary eosinophils immunohistochemically labeled for eosinophil peroxidase (EPX, brown cells).

**a, d-f, h** Individual data points represent independent biological replicates. Measurements were taken from discrete samples. Analyzed by Kruskal-Wallis test with Dunn's multiple comparisons correction. Solid horizontal lines and error bars overlaying data represent group means  $\pm$  standard deviation (SD). Dotted lines in (**a**) and (**d**) represent assay limit of detection. Solid horizontal lines above data represent pairwise comparisons with p-values. Results from 1 (**b-h**) or 2 (**a**) independent animal experiments.

**b, c** Measurements were taken from individual animals repeatedly. Results in (**b**) reported as group mean  $\pm$  SD. \*\*\*\* $p < 0.0001$ , PBS Mock versus iCoV2 + Alum, ##### $p < 0.0001$ , PBS Mock versus iCoV2 + RIBI, two-way ANOVA with Tukey's multiple comparisons correction.

Clinical scoring system: 0 = normal (blue); 1 = piloerection (orange); 2 = piloerection + kyphosis (red); 3 = piloerection, kyphosis and reduced movement (purple); 4 = markedly reduced movement and/or labored breathing (gray); 5 = moribund, dead or euthanized (black).

Number of animals used: **(a)** iFLU + Alum (6), iCoV2 + Alum (9), iCoV2 + RIBI (10). **(b, c)** iFLU + Alum (4), iCoV2 + Alum (4), iCoV2 + RIBI (4). **(d-h)** iFLU + Alum (2), iCoV2 + Alum (4), iCoV2 + RIBI (4).

Source data are provided as a Source Data file.

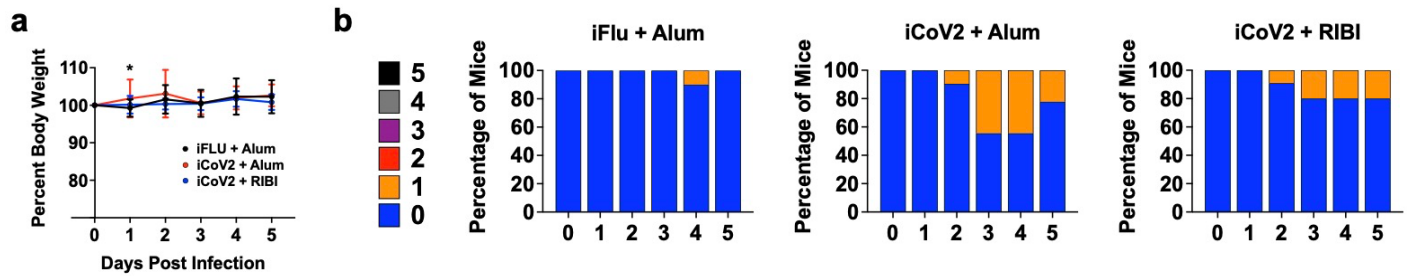

#### Supplementary Fig. 4: Clinical outcomes of Rs-SHC014-CoV challenge.

Vaccinated mice were challenged with Rs-SHC014-CoV at 4 weeks post-boost.

**a** Body weights were measured daily and reported as percent relative to baseline. **b** Clinical disease was evaluated daily using the clinical scoring system below. Measurements were taken from individual animals repeatedly. Combined results from 3 independent animal experiments (effects reproduced in each experiment). Results in **(a)** reported as group mean  $\pm$  SD. \* $p < 0.05$ , iFLU + Alum versus iCoV2 + Alum, two-way ANOVA with Tukey's multiple comparisons correction.

Number of animals used: **(a, b)** iFLU + Alum (22), iCoV2 + Alum (21), iCoV2 + RIBI (11).

Clinical scoring system: 0 = normal (blue), 1 = piloerection (orange), 2 = piloerection + kyphosis (red), 3 = piloerection, kyphosis and reduced movement (purple), 4 = markedly reduced movement and/or labored breathing (gray) and 5 = moribund, dead or euthanized (black).

Alum = aluminum hydroxide adjuvant; ANOVA = analysis of variance; DPI = days post-infection; iCoV2 = inactivated SARS-CoV-2 vaccine; iFLU = inactivated influenza virus vaccine; RIBI = Sigma Adjuvant System adjuvant; SD = standard deviation

Source data are provided as a Source Data file.

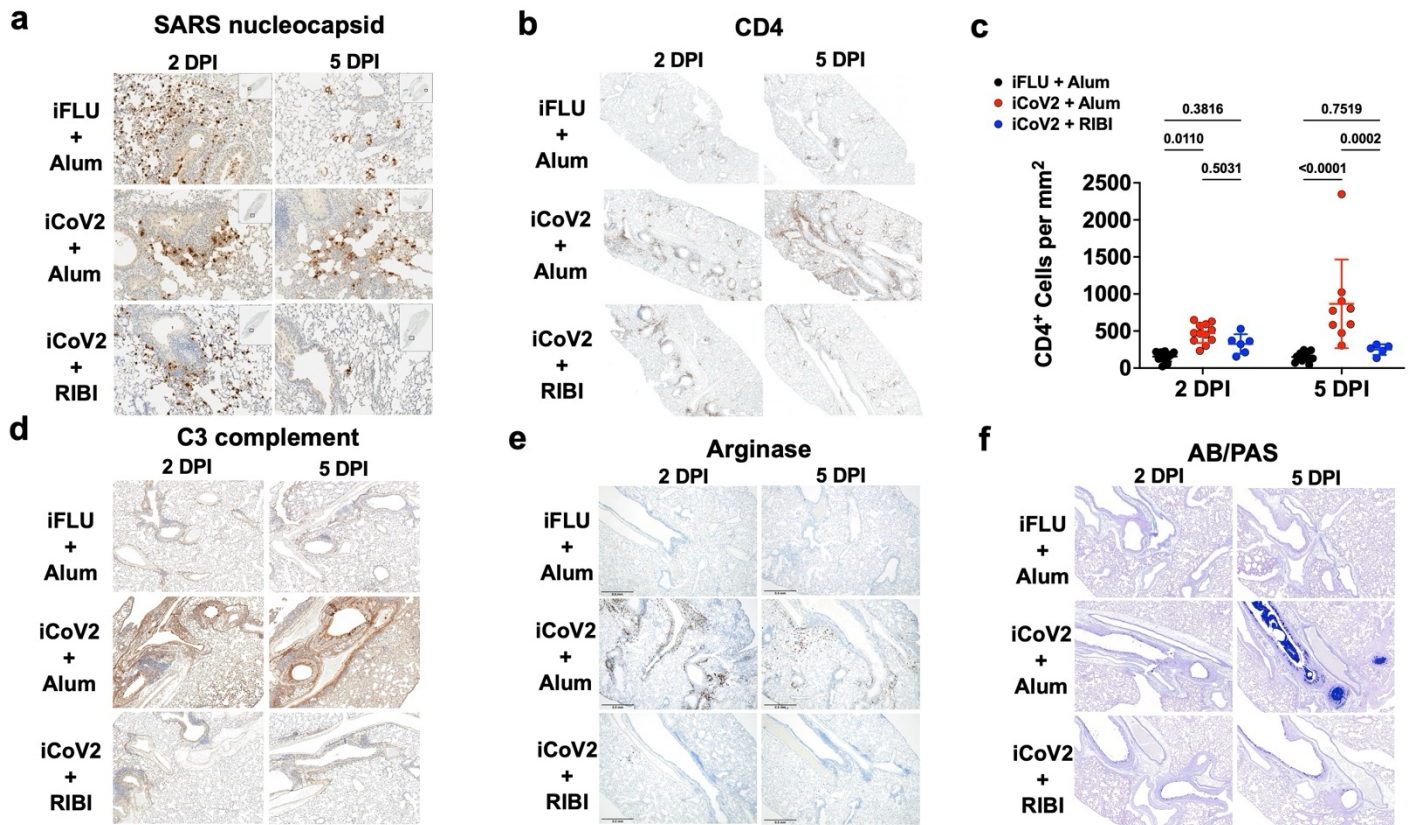

**Supplementary Fig. 5: Viral load and inflammation during Rs-SHC014-CoV infection.**

Vaccinated mice were challenged with Rs-SHC014-CoV at 4 weeks post-boost. Pulmonary tissue was collected at 2 and 5 DPI. Immunohistochemical staining was used to measure **a** SARS-CoV viral nucleocapsid antigen (100X magnification). **b** CD4<sup>+</sup> cells (20X magnification). **c** Quantitation of CD4<sup>+</sup> cells from **(b)**. **d** C3 complement protein deposition (40X magnification). **e** Arginase<sup>+</sup> cells (40X magnification). **f** Alcian Blue Periodic Acid-Schiff staining was used to measure mucus (40X magnification).

**a, b, d-f** Micrographs from one experiment. Images acquired from discrete samples.

**c** Individual data points represent independent biological replicates. Measurements were taken from discrete samples. Analyzed by two-way ANOVA with Tukey's multiple comparisons correction. Solid horizontal lines overlaying data represent group means. Error bars represent group SD. Solid horizontal lines above data represent pairwise comparisons with p-values. Results from one animal experiment.

Number of animals used: **(a-e)** 2 DPI – iFLU + Alum (12), iCoV2 + Alum (12), iCoV2 + RIBI (6); 5 DPI – iFLU + Alum (12), iCoV2 + Alum (9), iCoV2 + RIBI (5). One representative micrograph chosen from each group for presentation.

AB/PAS = Alcian Blue - Periodic Acid Schiff; Alum = aluminum hydroxide adjuvant; ANOVA = analysis of variance; DPI = days post-infection; iCoV2 = inactivated SARS-CoV-2 vaccine; iFLU = inactivated influenza virus vaccine; RIBI = Sigma Adjuvant System adjuvant

Source data are provided as a Source Data file.

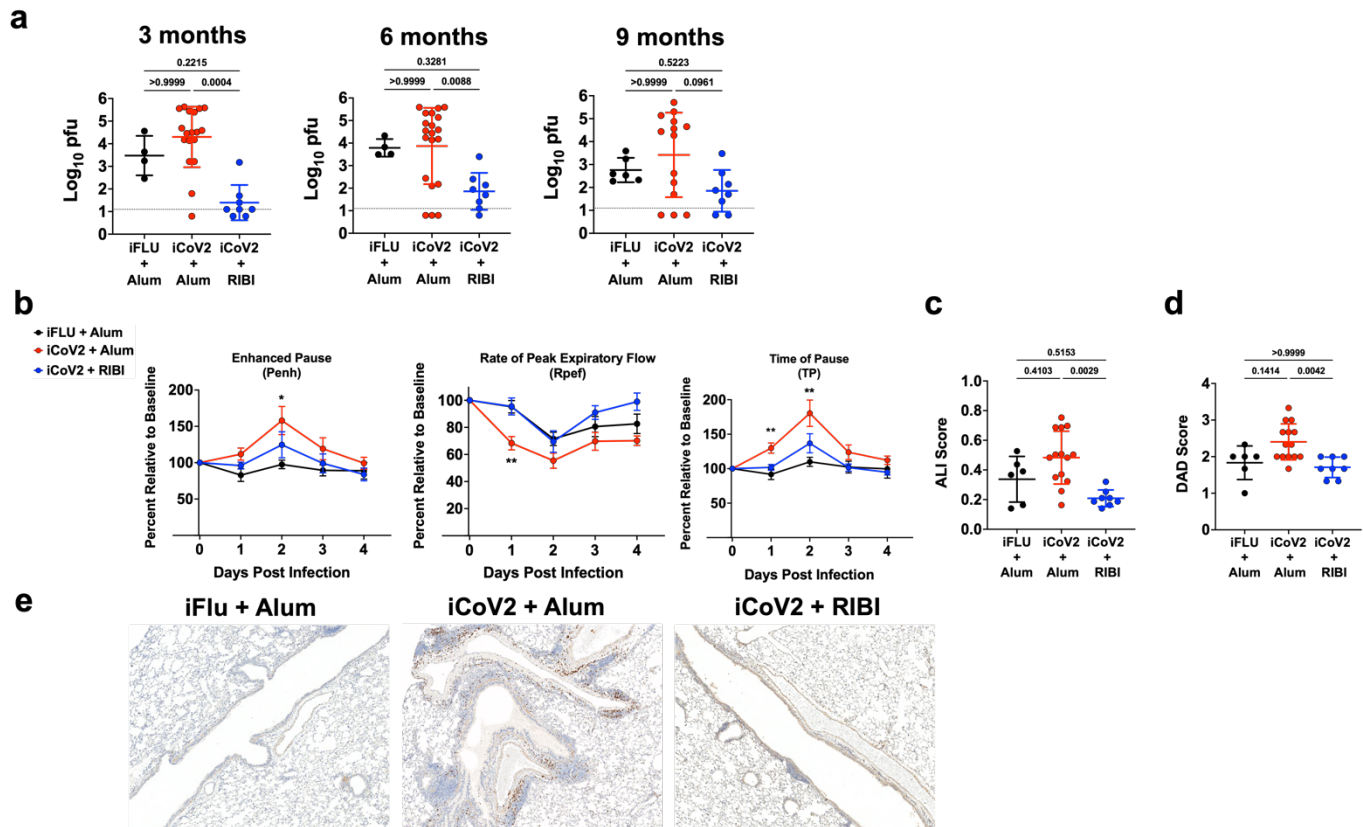

### Supplementary Fig. 6: Long-term safety and efficacy of inactivated SARS-CoV-2 vaccine against Rs-SHC014-CoV.

Vaccinated mice were challenged with Rs-SHC014-CoV at 3-, 6-, 9- and 10.5-months post-boost. Pulmonary function was measured 1-4 DPI using whole body plethysmography and pulmonary tissue was collected from vaccinated mice at 5 DPI.

**a** Pulmonary viral titers shown for mice challenged at 3-, 6- and 9-months post-boost. Log-transformed results reported as log<sub>10</sub> pfu. **b** Pulmonary function (**b**), acute lung injury (ALI) (**c**), and diffuse alveolar damage (DAD) (**d**) shown for mice challenged at 9 months post-boost. **e** Pulmonary eosinophils (eosinophil peroxidase [EPX]<sup>+</sup> cells) were measured at 10.5 months post-boost (latest collection time-point) using immunohistochemical staining (representative micrographs, 40X magnification; quantified in Fig. 2h).

**a, c, d** Individual data points represent independent biological replicates. Measurements were taken from discrete samples. Analyzed by Kruskal-Wallis test with Dunn's multiple comparisons correction. Solid horizontal lines overlaying data represent group mean group ± standard deviation. Dotted lines in (**a**) represent assay LOD. Solid horizontal lines above data represent pairwise comparisons with p-values. Results from multiple time points of one animal experiment.

**b** Measurements were taken from individual animals repeatedly. Reported as group mean ± SEM. \*p<0.05, \*\*p<0.01, iFLU + Alum versus iCoV2 + Alum, two-way ANOVA with Geisser-Greenhouse correction and Tukey's multiple comparisons correction. Results from one experiment.

Number of animals used: (**a**) 3 months – iFLU + Alum (4), iCoV2 + Alum (18), iCoV2 + RIBI (8); 6 months – iFLU + Alum (4), iCoV2 + Alum (20), iCoV2 + RIBI (8); 9 months – iFLU + Alum (6), iCoV2 + Alum (14), iCoV2 + RIBI (8). (**b-d**) iFLU + Alum (6), iCoV2 + Alum (14), iCoV2 + RIBI (8). (**e**) iFLU + Alum (5), iCoV2 + Alum (14), iCoV2 + RIBI (10).

Source data are provided as a Source Data file.



**a**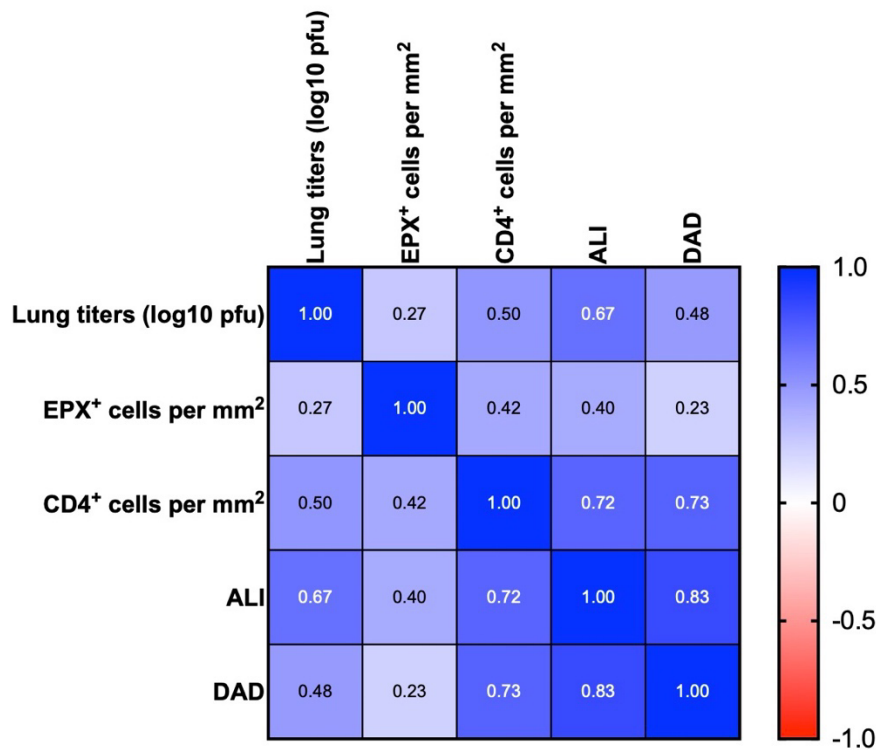**b**

|                                            | Lung titers (log10 pfu) | EPX <sup>+</sup> cells per mm <sup>2</sup> | CD4 <sup>+</sup> cells per mm <sup>2</sup> | ALI    | DAD    |
|--------------------------------------------|-------------------------|--------------------------------------------|--------------------------------------------|--------|--------|
| Lung titers (log10 pfu)                    |                         | 0.3548                                     | 0.0708                                     | 0.0111 | 0.0852 |
| EPX <sup>+</sup> cells per mm <sup>2</sup> | 0.3548                  |                                            | 0.1413                                     | 0.1535 | 0.4235 |
| CD4 <sup>+</sup> cells per mm <sup>2</sup> | 0.0708                  | 0.1413                                     |                                            | 0.0047 | 0.0038 |
| ALI                                        | 0.0111                  | 0.1535                                     | 0.0047                                     |        | 0.0004 |
| DAD                                        | 0.0852                  | 0.4235                                     | 0.0038                                     | 0.0004 |        |

**Supplementary Fig. 7: Correlation of vaccine-enhanced disease parameters during Rs-SHC014-CoV infection.**

Mice vaccinated with iCoV2 + Alum were challenged with Rs-SHC014-CoV at 10.5-months post-boost. Pulmonary tissue was collected from vaccinated mice at 5 DPI. Pulmonary viral titers, eosinophils (eosinophil peroxidase [EPX]<sup>+</sup> cells), CD4<sup>+</sup> cells, ALI, and DAD were evaluated. Multivariable correlation analysis (Spearman) was performed to evaluate for correlation between various disease parameters.

**a** Multivariable correlation matrix with pairwise Spearman *r* values. **b** Pairwise multiplicity-adjusted *p*-values (two-tailed).

Number of animals used: (**a**, **b**) 14.

ALI = acute lung injury; Alum = aluminum hydroxide adjuvant; DAD = diffuse alveolar damage; DPI = days post-infection; EPX = eosinophil peroxidase; iCoV2 = inactivated SARS-CoV-2 vaccine; pfu = plaque-forming units

Source data are provided as a Source Data file.

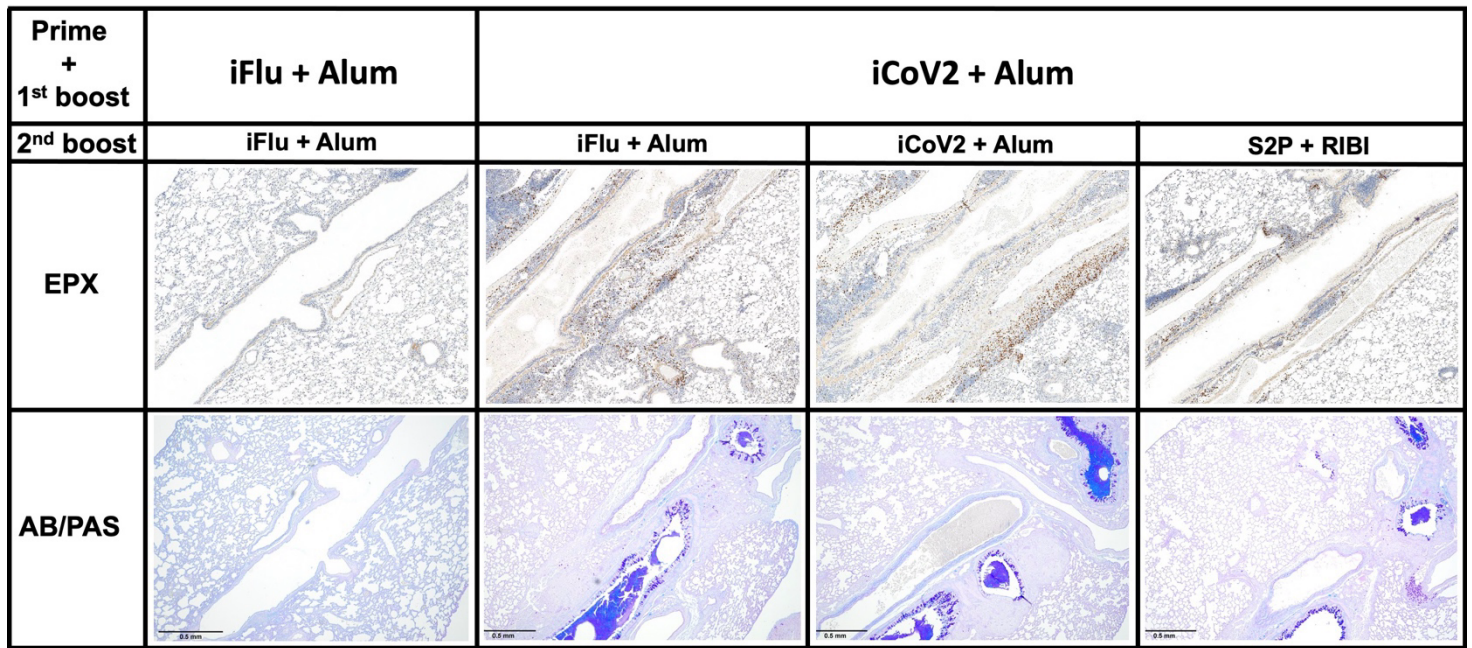

**Supplementary Fig. 8: Type 2 inflammation during Rs-SHC014-CoV infection following alternative boost vaccination.**

Approximately 9.5 months post-boost vaccination, mice received a third dose of iCoV2 + Alum or were boosted with a heterologous vaccine formulation (S2P + RIBI). Four weeks post-second boost, mice were challenged with Rs-SHC014-CoV. Pulmonary tissue was collected 5 DPI.

Eosinophils (eosinophil peroxidase [EPX]<sup>+</sup> cells) were measured using immunohistochemical staining. Mucus was measured using Alcian Blue Periodic Acid-Schiff staining. Representative micrographs (scale bar = 0.5mm; EPX quantified in Fig. 4e) from 1 experiment. Images acquired from discrete samples.

Number of animals used: iFLU + Alum, iFLU + Alum (5), iCoV2 + Alum, iFLU + Alum (14), iCoV2 + Alum, iCoV2 + Alum (10), iCoV2 + Alum, S2P + RIBI (10). One representative micrograph chosen from each group for presentation.

AB/PAS = Alcian Blue - Periodic Acid Schiff; Alum = aluminum hydroxide adjuvant; DPI = days post-infection; EPX = eosinophil peroxidase; iCoV2 = inactivated SARS-CoV-2 vaccine; iFLU = inactivated influenza virus vaccine; RIBI = Sigma Adjuvant System adjuvant; S2P = pre-fusion stabilized SARS-CoV-2 spike protein

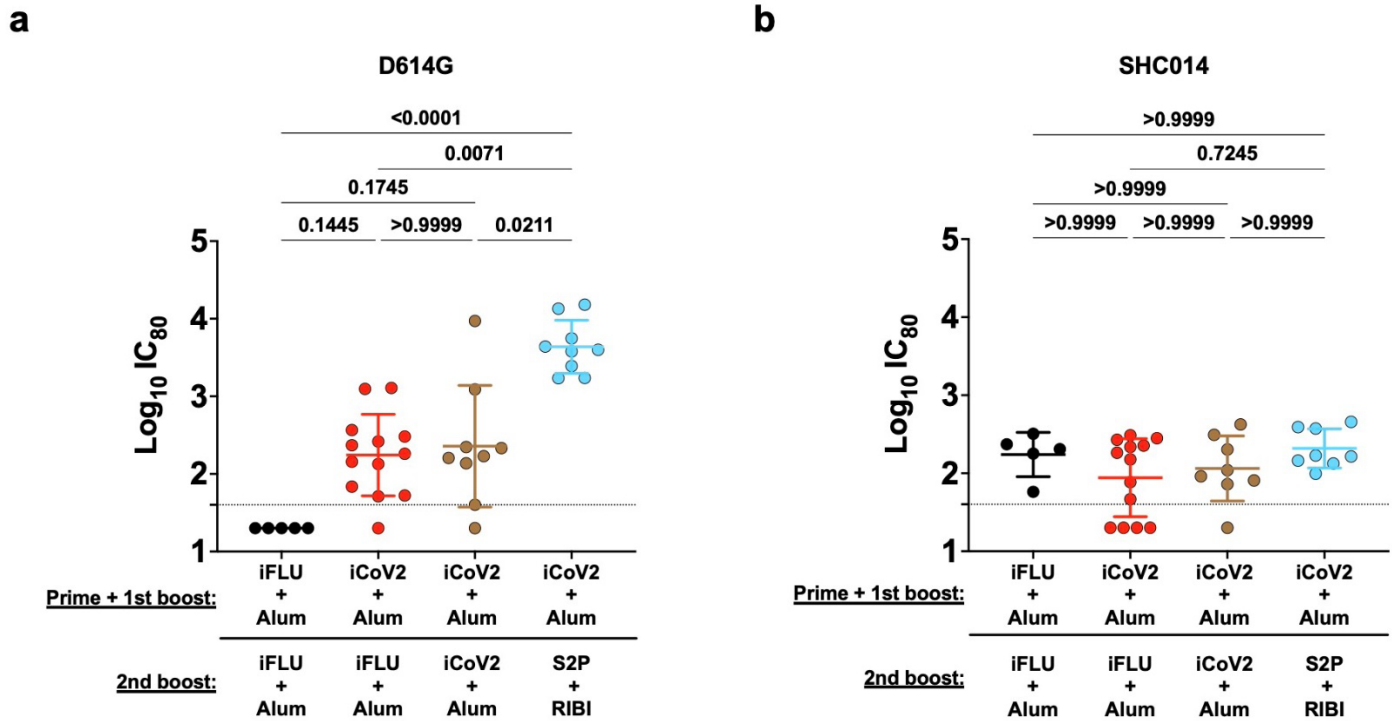

**Supplementary Fig. 9: Serum neutralization titers induced by alternative boost vaccines.**

Mice were initially vaccinated with inactivated SARS-CoV-2 and aluminum hydroxide adjuvant (iCoV2 + Alum). Approximately 9.5 months post-boost vaccination, mice were administered either a third dose of iCoV2 + Alum (homologous second boost) or were boosted with an alternative vaccine formulation (recombinant full-length pre-fusion stabilized spike protein [S2P] + RIBI) 4 weeks prior to challenge with Rs-SHC014-CoV (SHC014). Post-boost serum samples were collected prior to challenge and neutralizing antibody titers against SARS-CoV-2 (D614G) (**a**) or SHC014 (**b**) were measured using a luminescence-based microneutralization assay.

**a, b** Log-transformed serum neutralization titers reported as  $\text{IC}_{80}$ . Individual data points represent independent biological replicates. Measurements were taken from discrete samples. Results from 1 animal experiment. Analyzed by Kruskal-Wallis test with Dunn's multiple comparisons correction. Solid horizontal lines overlaying data represent group means. Error bars represent group SD. Dotted lines represent assay LOD. Solid horizontal lines above data represent pairwise comparisons with p-values.

Number of animals used: **(a)** iFLU + Alum, iFLU + Alum (5); iCoV2 + Alum, iFLU + Alum (13), iCoV2 + Alum, iCoV2 + Alum (9); iCoV2 + Alum, S2P + RIBI (9). **(b)** iFLU + Alum, iFLU + Alum (5), iCoV2 + Alum, iFLU + Alum (13), iCoV2 + Alum, iCoV2 + Alum (8), iCoV2 + Alum, S2P + RIBI (8).

Alum = aluminum hydroxide adjuvant;  $\text{IC}_{80}$  = 80% serum reciprocal inhibitory dilution titer; iCoV2 = inactivated SARS-CoV-2 vaccine; iFLU = inactivated influenza virus vaccine; LOD = limit of detection; RIBI = Sigma Adjuvant System adjuvant; S2P = pre-fusion stabilized SARS-CoV-2 spike protein; SD = standard deviation;

Source data are provided as a Source Data file.

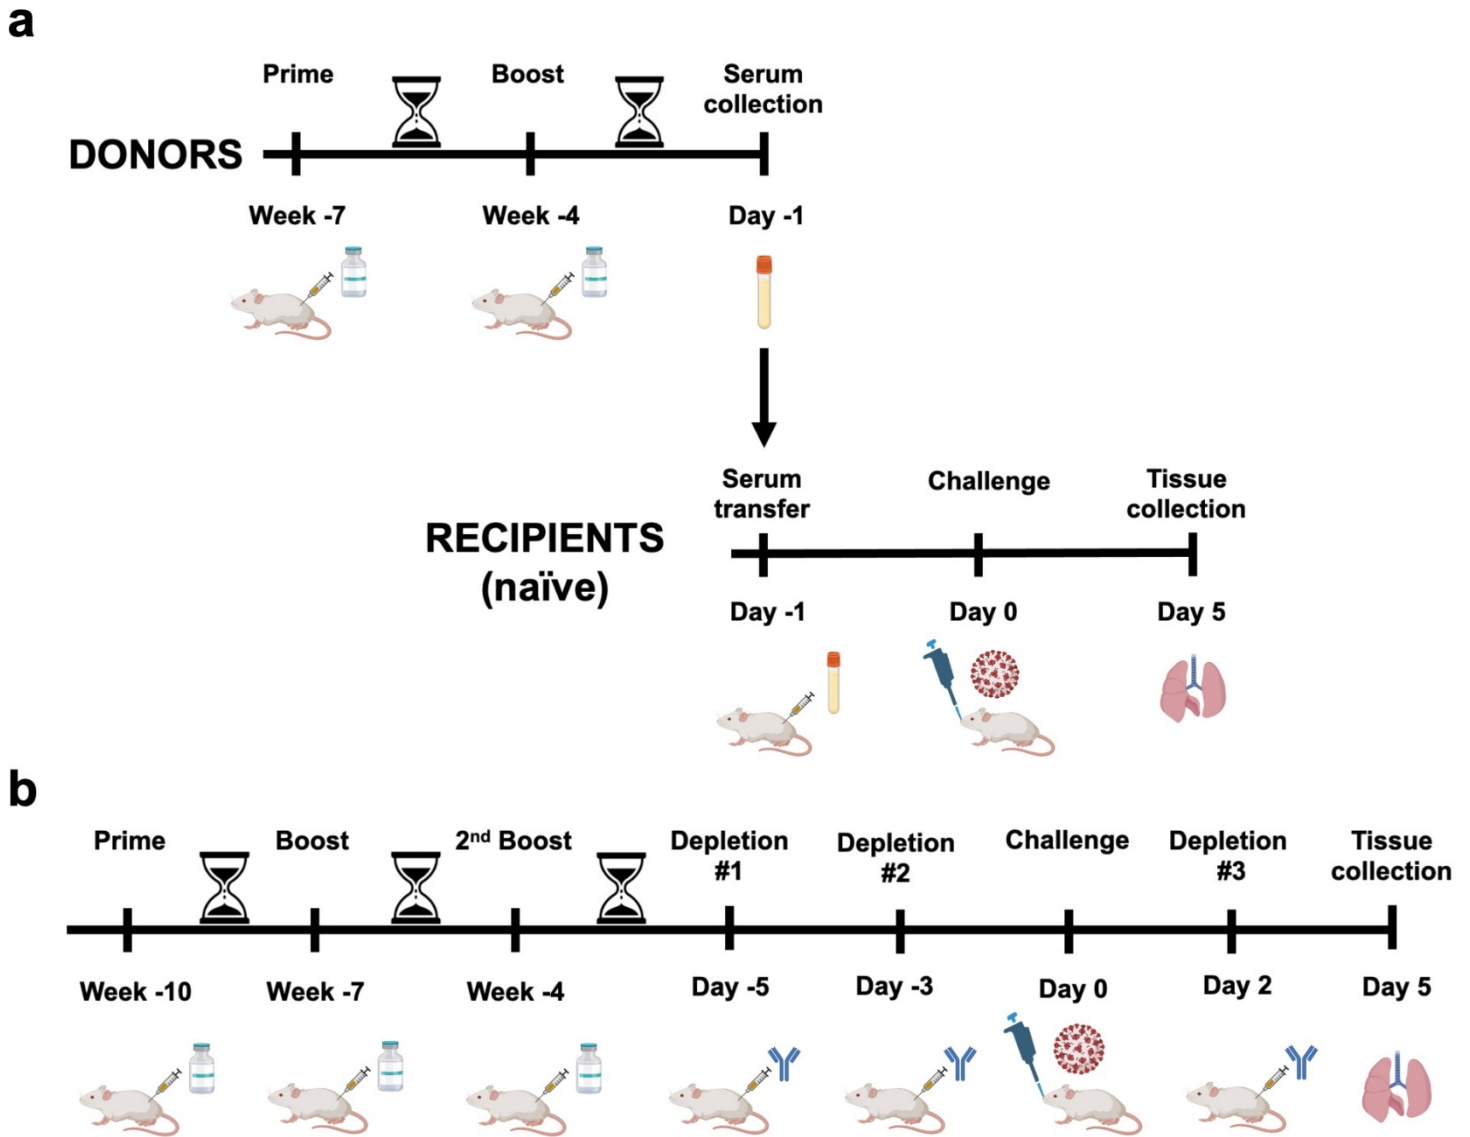

**Supplementary Fig. 10: Experimental outlines for passive serum transfer and CD4<sup>+</sup> cell depletion.**

**a** Donor mice were vaccinated with iCoV2 (+ Alum or RIBI). Four weeks post-boost, serum was collected from donor mice and transferred to naïve recipient mice 1 day prior to challenge with Rs-SHC014-CoV. Pulmonary function was measured 1-4 DPI using WBP and pulmonary tissue was collected at 5 DPI.

**b** Mice were vaccinated using the double-boost method with iCoV2 + Alum. To deplete CD4<sup>+</sup> T<sub>H</sub> cells, anti-CD4 monoclonal antibody (GK1.5) was administered to mice before and during viral challenge with Rs-SHC014-CoV. Pulmonary function was measured 1-4 DPI using WBP and pulmonary tissue was collected at 5 DPI.

Alum = aluminum hydroxide adjuvant; DPI = days post-infection; iCoV2 = inactivated SARS-CoV-2 vaccine; T<sub>H</sub> = T helper; WBP = Whole body plethysmography

Created with Biorender.

## Supplementary Table 1: Pulmonary gene pathway enrichment during Rs-SHC014-CoV infection.

Vaccinated mice were challenged with Rs-SHC014-CoV 4 weeks post-boost. Pulmonary tissue was collected from vaccinated mice at 2 or 5 DPI. RNA-Seq and Gene Ontology Enrichment analysis were performed using whole pulmonary tissue. Pathways displayed are upregulated or downregulated (+/-) in iCoV2 + Alum- or iCoV2 + RIBI-vaccinated mice compared to mice in the opposite vaccine group (e.g., 5DPI\_iCoV2 + Alum = upregulated at 5 DPI in iCoV2 + Alum-vaccinated mice compared to iCoV2 + RIBI-vaccinated mice). Analysis was performed on discrete samples. Data analysis is described in detail in RNA Sequencing (RNA-Seq) in Methods.

Number of animals used: 2 DPI – iCoV2 + Alum (12), iCoV2 + RIBI (6); 5 DPI – iCoV2 + Alum (9), iCoV2 + RIBI (5).

Alum = aluminum hydroxide adjuvant; DPI = days post-infection; FDR = False Discovery Rate; GO = Gene Ontology; iCoV2 = inactivated SARS-CoV-2 vaccine; RIBI = Sigma Adjuvant System adjuvant

| GO Term Name                                           | GO ID      | REF Gene List | Observed Genes | Expected Genes | +/- | Fold Enrichment | Enrichment p-value | Enrichment FDR | DPI & Vaccine     |
|--------------------------------------------------------|------------|---------------|----------------|----------------|-----|-----------------|--------------------|----------------|-------------------|
| complement component C3b binding                       | GO:0001851 | 9             | 1              | 0              | +   | > 100           | 5.44E-03           | 1E+00          | 2DPI_iCoV2 + RIBI |
| carbohydrate binding                                   | GO:0030246 | 283           | 2              | 0.15           | +   | 12.95           | 1.01E-02           | 1E+00          | 2DPI_iCoV2 + RIBI |
| polypeptide N-acetylgalactosaminyltransferase activity | GO:0004653 | 18            | 1              | 0.01           | +   | > 100           | 1.03E-02           | 1E+00          | 2DPI_iCoV2 + RIBI |
| opsonin binding                                        | GO:0001846 | 22            | 1              | 0.01           | +   | 83.32           | 1.25E-02           | 1E+00          | 2DPI_iCoV2 + RIBI |
| complement binding                                     | GO:0001848 | 28            | 1              | 0.02           | +   | 65.47           | 1.57E-02           | 1E+00          | 2DPI_iCoV2 + RIBI |
| polysaccharide binding                                 | GO:0030247 | 28            | 1              | 0.02           | +   | 65.47           | 1.57E-02           | 1E+00          | 2DPI_iCoV2 + RIBI |
| acetylgalactosaminyltransferase activity               | GO:0008376 | 33            | 1              | 0.02           | +   | 55.55           | 1.84E-02           | 1E+00          | 2DPI_iCoV2 + RIBI |
| carbohydrate transmembrane transporter activity        | GO:0015144 | 38            | 1              | 0.02           | +   | 48.24           | 2.11E-02           | 1E+00          | 2DPI_iCoV2 + RIBI |
| calcium channel regulator activity                     | GO:0005246 | 42            | 1              | 0.02           | +   | 43.64           | 2.32E-02           | 1E+00          | 2DPI_iCoV2 + RIBI |
| scavenger receptor activity                            | GO:0005044 | 43            | 1              | 0.02           | +   | 42.63           | 2.37E-02           | 1E+00          | 2DPI_iCoV2 + RIBI |
| E-box binding                                          | GO:0070888 | 58            | 1              | 0.03           | +   | 31.6            | 3.17E-02           | 1E+00          | 2DPI_iCoV2 + RIBI |
| cargo receptor activity                                | GO:0038024 | 82            | 1              | 0.04           | +   | 22.35           | 4.43E-02           | 1E+00          | 2DPI_iCoV2 + RIBI |
| cytokine activity                                      | GO:0005125 | 231           | 11             | 0.8            | +   | 13.78           | 6.7E-10            | 3.35E-06       | 2DPI_iCoV2 + Alum |
| receptor ligand activity                               | GO:0048018 | 534           | 14             | 1.84           | +   | 7.59            | 4.8E-09            | 1.2E-05        | 2DPI_iCoV2 + Alum |
| signaling receptor activator activity                  | GO:0030546 | 545           | 14             | 1.88           | +   | 7.44            | 6.17E-09           | 1.03E-05       | 2DPI_iCoV2 + Alum |
| chemokine activity                                     | GO:0008009 | 42            | 6              | 0.15           | +   | 41.35           | 1.49E-08           | 1.86E-05       | 2DPI_iCoV2 + Alum |
| signaling receptor regulator activity                  | GO:0030545 | 591           | 14             | 2.04           | +   | 6.86            | 1.67E-08           | 1.67E-05       | 2DPI_iCoV2 + Alum |
| CCR chemokine receptor binding                         | GO:0048020 | 58            | 6              | 0.2            | +   | 29.94           | 8.72E-08           | 7.25E-05       | 2DPI_iCoV2 + Alum |
| cytokine receptor binding                              | GO:0005126 | 316           | 10             | 1.09           | +   | 9.16            | 1.73E-07           | 1.24E-04       | 2DPI_iCoV2 + Alum |

|                                                                                                                                      |            |      |    |       |   |       |          |          |                   |
|--------------------------------------------------------------------------------------------------------------------------------------|------------|------|----|-------|---|-------|----------|----------|-------------------|
| <b>chemokine receptor binding</b>                                                                                                    | GO:0042379 | 79   | 6  | 0.27  | + | 21.98 | 4.8E-07  | 3E-04    | 2DPI_iCoV2 + Alum |
| <b>molecular function regulator activity</b>                                                                                         | GO:0098772 | 2147 | 23 | 7.42  | + | 3.1   | 5.9E-07  | 3.27E-04 | 2DPI_iCoV2 + Alum |
| <b>signaling receptor binding</b>                                                                                                    | GO:0005102 | 1650 | 19 | 5.7   | + | 3.33  | 2.62E-06 | 1.31E-03 | 2DPI_iCoV2 + Alum |
| <b>molecular function activator activity</b>                                                                                         | GO:0140677 | 1192 | 16 | 4.12  | + | 3.89  | 2.83E-06 | 1.28E-03 | 2DPI_iCoV2 + Alum |
| <b>chitin binding</b>                                                                                                                | GO:0008061 | 11   | 3  | 0.04  | + | 78.94 | 1.39E-05 | 5.78E-03 | 2DPI_iCoV2 + Alum |
| <b>G protein-coupled receptor binding</b>                                                                                            | GO:0001664 | 328  | 8  | 1.13  | + | 7.06  | 2.03E-05 | 7.81E-03 | 2DPI_iCoV2 + Alum |
| <b>carbohydrate binding</b>                                                                                                          | GO:0030246 | 283  | 7  | 0.98  | + | 7.16  | 6.33E-05 | 2.26E-02 | 2DPI_iCoV2 + Alum |
| <b>CCR3 chemokine receptor binding</b>                                                                                               | GO:0031728 | 5    | 2  | 0.02  | + | > 100 | 2.43E-04 | 8.08E-02 | 2DPI_iCoV2 + Alum |
| <b>brain-derived neurotrophic factor binding</b>                                                                                     | GO:0048403 | 5    | 2  | 0.02  | + | > 100 | 2.43E-04 | 7.58E-02 | 2DPI_iCoV2 + Alum |
| <b>mannose binding</b>                                                                                                               | GO:0005537 | 33   | 3  | 0.11  | + | 26.31 | 2.58E-04 | 7.58E-02 | 2DPI_iCoV2 + Alum |
| <b>protein binding</b>                                                                                                               | GO:0005515 | 9462 | 48 | 32.69 | + | 1.47  | 4.56E-04 | 1.27E-01 | 2DPI_iCoV2 + Alum |
| <b>serine-type endopeptidase activity</b>                                                                                            | GO:0004252 | 194  | 5  | 0.67  | + | 7.46  | 6.23E-04 | 1.64E-01 | 2DPI_iCoV2 + Alum |
| <b>nerve growth factor binding</b>                                                                                                   | GO:0048406 | 9    | 2  | 0.03  | + | 64.32 | 6.31E-04 | 1.57E-01 | 2DPI_iCoV2 + Alum |
| <b>serine-type peptidase activity</b>                                                                                                | GO:0008236 | 211  | 5  | 0.73  | + | 6.86  | 9.01E-04 | 2.14E-01 | 2DPI_iCoV2 + Alum |
| <b>serine hydrolase activity</b>                                                                                                     | GO:0017171 | 216  | 5  | 0.75  | + | 6.7   | 9.98E-04 | 2.26E-01 | 2DPI_iCoV2 + Alum |
| <b>serine-type endopeptidase inhibitor activity</b>                                                                                  | GO:0004867 | 129  | 4  | 0.45  | + | 8.97  | 1.16E-03 | 2.51E-01 | 2DPI_iCoV2 + Alum |
| <b>neurotrophin binding</b>                                                                                                          | GO:0043121 | 13   | 2  | 0.04  | + | 44.53 | 1.19E-03 | 2.48E-01 | 2DPI_iCoV2 + Alum |
| <b>growth factor activity</b>                                                                                                        | GO:0008083 | 149  | 4  | 0.51  | + | 7.77  | 1.93E-03 | 3.86E-01 | 2DPI_iCoV2 + Alum |
| <b>adrenergic receptor binding</b>                                                                                                   | GO:0031690 | 23   | 2  | 0.08  | + | 25.17 | 3.33E-03 | 6.4E-01  | 2DPI_iCoV2 + Alum |
| <b>oxidoreductase activity, acting on single donors with incorporation of molecular oxygen, incorporation of two atoms of oxygen</b> | GO:0016702 | 26   | 2  | 0.09  | + | 22.26 | 4.17E-03 | 7.71E-01 | 2DPI_iCoV2 + Alum |
| <b>monosaccharide binding</b>                                                                                                        | GO:0048029 | 92   | 3  | 0.32  | + | 9.44  | 4.33E-03 | 7.71E-01 | 2DPI_iCoV2 + Alum |
| <b>oxidoreductase activity, acting on single donors with incorporation of molecular oxygen</b>                                       | GO:0016701 | 27   | 2  | 0.09  | + | 21.44 | 4.47E-03 | 7.7E-01  | 2DPI_iCoV2 + Alum |
| <b>endopeptidase inhibitor activity</b>                                                                                              | GO:0004866 | 195  | 4  | 0.67  | + | 5.94  | 4.96E-03 | 8.25E-01 | 2DPI_iCoV2 + Alum |
| <b>endopeptidase activity</b>                                                                                                        | GO:0004175 | 453  | 6  | 1.57  | + | 3.83  | 5.02E-03 | 8.08E-01 | 2DPI_iCoV2 + Alum |
| <b>peptidase inhibitor activity</b>                                                                                                  | GO:0030414 | 202  | 4  | 0.7   | + | 5.73  | 5.6E-03  | 8.73E-01 | 2DPI_iCoV2 + Alum |
| <b>endopeptidase regulator activity</b>                                                                                              | GO:0061135 | 214  | 4  | 0.74  | + | 5.41  | 6.82E-03 | 1E+00    | 2DPI_iCoV2 + Alum |
| <b>chemokine binding</b>                                                                                                             | GO:0019956 | 34   | 2  | 0.12  | + | 17.03 | 6.83E-03 | 1E+00    | 2DPI_iCoV2 + Alum |
| <b>galactose:sodium symporter activity</b>                                                                                           | GO:0015371 | 1    | 1  | 0     | + | > 100 | 6.87E-03 | 9.8E-01  | 2DPI_iCoV2 + Alum |

|                                                                 |            |     |   |      |   |       |          |          |                   |
|-----------------------------------------------------------------|------------|-----|---|------|---|-------|----------|----------|-------------------|
| <b>CCR4 chemokine receptor binding</b>                          | GO:0031729 | 1   | 1 | 0    | + | > 100 | 6.87E-03 | 9.53E-01 | 2DPI_iCoV2 + Alum |
| <b>glycine amidinotransferase activity</b>                      | GO:0015068 | 1   | 1 | 0    | + | > 100 | 6.87E-03 | 9.27E-01 | 2DPI_iCoV2 + Alum |
| <b>amidinotransferase activity</b>                              | GO:0015067 | 1   | 1 | 0    | + | > 100 | 6.87E-03 | 9.03E-01 | 2DPI_iCoV2 + Alum |
| <b>interleukin-13 receptor binding</b>                          | GO:0005144 | 1   | 1 | 0    | + | > 100 | 6.87E-03 | 8.8E-01  | 2DPI_iCoV2 + Alum |
| <b>peptidase activity</b>                                       | GO:0008233 | 642 | 7 | 2.22 | + | 3.16  | 6.97E-03 | 8.7E-01  | 2DPI_iCoV2 + Alum |
| <b>virus receptor activity</b>                                  | GO:0001618 | 41  | 2 | 0.14 | + | 14.12 | 9.64E-03 | 1E+00    | 2DPI_iCoV2 + Alum |
| <b>exogenous protein binding</b>                                | GO:0140272 | 42  | 2 | 0.15 | + | 13.78 | 1.01E-02 | 1E+00    | 2DPI_iCoV2 + Alum |
| <b>inorganic diphosphate transmembrane transporter activity</b> | GO:0030504 | 2   | 1 | 0.01 | + | > 100 | 1.03E-02 | 1E+00    | 2DPI_iCoV2 + Alum |
| <b>arginase activity</b>                                        | GO:0004053 | 2   | 1 | 0.01 | + | > 100 | 1.03E-02 | 1E+00    | 2DPI_iCoV2 + Alum |
| <b>netrin receptor binding</b>                                  | GO:1990890 | 2   | 1 | 0.01 | + | > 100 | 1.03E-02 | 1E+00    | 2DPI_iCoV2 + Alum |
| <b>alpha-2C adrenergic receptor binding</b>                     | GO:0031696 | 2   | 1 | 0.01 | + | > 100 | 1.03E-02 | 1E+00    | 2DPI_iCoV2 + Alum |
| <b>alpha-glucoside transmembrane transporter activity</b>       | GO:0015151 | 2   | 1 | 0.01 | + | > 100 | 1.03E-02 | 1E+00    | 2DPI_iCoV2 + Alum |
| <b>interleukin-5 receptor binding</b>                           | GO:0005137 | 2   | 1 | 0.01 | + | > 100 | 1.03E-02 | 1E+00    | 2DPI_iCoV2 + Alum |
| <b>interleukin-8 binding</b>                                    | GO:0019959 | 3   | 1 | 0.01 | + | 96.48 | 1.37E-02 | 1E+00    | 2DPI_iCoV2 + Alum |
| <b>alpha2-adrenergic receptor activity</b>                      | GO:0004938 | 3   | 1 | 0.01 | + | 96.48 | 1.37E-02 | 1E+00    | 2DPI_iCoV2 + Alum |
| <b>iodide transmembrane transporter activity</b>                | GO:0015111 | 3   | 1 | 0.01 | + | 96.48 | 1.37E-02 | 1E+00    | 2DPI_iCoV2 + Alum |
| <b>tryptophan 2,3-dioxygenase activity</b>                      | GO:0004833 | 3   | 1 | 0.01 | + | 96.48 | 1.37E-02 | 1E+00    | 2DPI_iCoV2 + Alum |
| <b>glucoside transmembrane transporter activity</b>             | GO:0042947 | 3   | 1 | 0.01 | + | 96.48 | 1.37E-02 | 1E+00    | 2DPI_iCoV2 + Alum |
| <b>interleukin-4 receptor binding</b>                           | GO:0005136 | 3   | 1 | 0.01 | + | 96.48 | 1.37E-02 | 1E+00    | 2DPI_iCoV2 + Alum |
| <b>cytokine binding</b>                                         | GO:0019955 | 142 | 3 | 0.49 | + | 6.11  | 1.38E-02 | 1E+00    | 2DPI_iCoV2 + Alum |
| <b>peptidase regulator activity</b>                             | GO:0061134 | 267 | 4 | 0.92 | + | 4.34  | 1.43E-02 | 1E+00    | 2DPI_iCoV2 + Alum |
| <b>sulfur compound transmembrane transporter activity</b>       | GO:1901682 | 54  | 2 | 0.19 | + | 10.72 | 1.6E-02  | 1E+00    | 2DPI_iCoV2 + Alum |
| <b>growth factor receptor binding</b>                           | GO:0070851 | 151 | 3 | 0.52 | + | 5.75  | 1.62E-02 | 1E+00    | 2DPI_iCoV2 + Alum |
| <b>channel regulator activity</b>                               | GO:0016247 | 154 | 3 | 0.53 | + | 5.64  | 1.7E-02  | 1E+00    | 2DPI_iCoV2 + Alum |
| <b>arachidonate 15-lipoxygenase activity</b>                    | GO:0050473 | 4   | 1 | 0.01 | + | 72.36 | 1.71E-02 | 1E+00    | 2DPI_iCoV2 + Alum |
| <b>N-acetyl-beta-D-galactosaminidase activity</b>               | GO:0102148 | 4   | 1 | 0.01 | + | 72.36 | 1.71E-02 | 1E+00    | 2DPI_iCoV2 + Alum |
| <b>group III metabotropic glutamate receptor activity</b>       | GO:0001642 | 4   | 1 | 0.01 | + | 72.36 | 1.71E-02 | 1E+00    | 2DPI_iCoV2 + Alum |
| <b>linoleate 13S-lipoxygenase activity</b>                      | GO:0016165 | 4   | 1 | 0.01 | + | 72.36 | 1.71E-02 | 1E+00    | 2DPI_iCoV2 + Alum |

|                                                                            |            |       |    |       |   |        |          |       |                   |
|----------------------------------------------------------------------------|------------|-------|----|-------|---|--------|----------|-------|-------------------|
| arachidonate 12-lipoxygenase activity                                      | GO:0004052 | 4     | 1  | 0.01  | + | 72.36  | 1.71E-02 | 1E+00 | 2DPI_iCoV2 + Alum |
| histone acetyltransferase regulator activity                               | GO:0035034 | 4     | 1  | 0.01  | + | 72.36  | 1.71E-02 | 1E+00 | 2DPI_iCoV2 + Alum |
| norepinephrine binding                                                     | GO:0051380 | 4     | 1  | 0.01  | + | 72.36  | 1.71E-02 | 1E+00 | 2DPI_iCoV2 + Alum |
| alpha-2A adrenergic receptor binding                                       | GO:0031694 | 4     | 1  | 0.01  | + | 72.36  | 1.71E-02 | 1E+00 | 2DPI_iCoV2 + Alum |
| extracellular matrix binding                                               | GO:0050840 | 57    | 2  | 0.2   | + | 10.16  | 1.76E-02 | 1E+00 | 2DPI_iCoV2 + Alum |
| tumor necrosis factor binding                                              | GO:0043120 | 5     | 1  | 0.02  | + | 57.89  | 2.05E-02 | 1E+00 | 2DPI_iCoV2 + Alum |
| guanylate cyclase activator activity                                       | GO:0030250 | 5     | 1  | 0.02  | + | 57.89  | 2.05E-02 | 1E+00 | 2DPI_iCoV2 + Alum |
| galactose transmembrane transporter activity                               | GO:0005354 | 5     | 1  | 0.02  | + | 57.89  | 2.05E-02 | 1E+00 | 2DPI_iCoV2 + Alum |
| type 1 fibroblast growth factor receptor binding                           | GO:0005105 | 6     | 1  | 0.02  | + | 48.24  | 2.39E-02 | 1E+00 | 2DPI_iCoV2 + Alum |
| chitinase activity                                                         | GO:0004568 | 6     | 1  | 0.02  | + | 48.24  | 2.39E-02 | 1E+00 | 2DPI_iCoV2 + Alum |
| beta-N-acetylhexosaminidase activity                                       | GO:0004563 | 6     | 1  | 0.02  | + | 48.24  | 2.39E-02 | 1E+00 | 2DPI_iCoV2 + Alum |
| guanylate cyclase regulator activity                                       | GO:0030249 | 6     | 1  | 0.02  | + | 48.24  | 2.39E-02 | 1E+00 | 2DPI_iCoV2 + Alum |
| epinephrine binding                                                        | GO:0051379 | 6     | 1  | 0.02  | + | 48.24  | 2.39E-02 | 1E+00 | 2DPI_iCoV2 + Alum |
| alpha-adrenergic receptor activity                                         | GO:0004936 | 6     | 1  | 0.02  | + | 48.24  | 2.39E-02 | 1E+00 | 2DPI_iCoV2 + Alum |
| fucose binding                                                             | GO:0042806 | 7     | 1  | 0.02  | + | 41.35  | 2.72E-02 | 1E+00 | 2DPI_iCoV2 + Alum |
| heterotrimeric G-protein binding                                           | GO:0032795 | 7     | 1  | 0.02  | + | 41.35  | 2.72E-02 | 1E+00 | 2DPI_iCoV2 + Alum |
| interleukin-1 binding                                                      | GO:0019966 | 7     | 1  | 0.02  | + | 41.35  | 2.72E-02 | 1E+00 | 2DPI_iCoV2 + Alum |
| C-X-C chemokine binding                                                    | GO:0019958 | 7     | 1  | 0.02  | + | 41.35  | 2.72E-02 | 1E+00 | 2DPI_iCoV2 + Alum |
| ABC-type glutathione S-conjugate transporter activity                      | GO:0015431 | 7     | 1  | 0.02  | + | 41.35  | 2.72E-02 | 1E+00 | 2DPI_iCoV2 + Alum |
| thyroid hormone binding                                                    | GO:0070324 | 7     | 1  | 0.02  | + | 41.35  | 2.72E-02 | 1E+00 | 2DPI_iCoV2 + Alum |
| binding                                                                    | GO:0005488 | 14105 | 58 | 48.73 | + | 1.19   | 3.04E-02 | 1E+00 | 2DPI_iCoV2 + Alum |
| D-glucose transmembrane transporter activity                               | GO:0055056 | 8     | 1  | 0.03  | + | 36.18  | 3.06E-02 | 1E+00 | 2DPI_iCoV2 + Alum |
| RNA binding                                                                | GO:0003723 | 1113  | 0  | 3.85  | - | < 0.01 | 3.35E-02 | 1E+00 | 2DPI_iCoV2 + Alum |
| adenylate cyclase inhibiting G protein-coupled glutamate receptor activity | GO:0001640 | 9     | 1  | 0.03  | + | 32.16  | 3.39E-02 | 1E+00 | 2DPI_iCoV2 + Alum |
| 3-chloroallyl aldehyde dehydrogenase activity                              | GO:0004028 | 9     | 1  | 0.03  | + | 32.16  | 3.39E-02 | 1E+00 | 2DPI_iCoV2 + Alum |
| G protein-coupled glutamate receptor activity                              | GO:0098988 | 9     | 1  | 0.03  | + | 32.16  | 3.39E-02 | 1E+00 | 2DPI_iCoV2 + Alum |
| glucose:sodium symporter activity                                          | GO:0005412 | 9     | 1  | 0.03  | + | 32.16  | 3.39E-02 | 1E+00 | 2DPI_iCoV2 + Alum |
| adrenergic receptor activity                                               | GO:0004935 | 9     | 1  | 0.03  | + | 32.16  | 3.39E-02 | 1E+00 | 2DPI_iCoV2 + Alum |
| chloride:bicarbonate antiporter activity                                   | GO:0140900 | 9     | 1  | 0.03  | + | 32.16  | 3.39E-02 | 1E+00 | 2DPI_iCoV2 + Alum |



|                                                                                |            |       |     |        |   |        |          |          |                   |
|--------------------------------------------------------------------------------|------------|-------|-----|--------|---|--------|----------|----------|-------------------|
| <b>bicarbonate:monoatomic anion antiporter activity</b>                        | GO:0140829 | 9     | 1   | 0.03   | + | 32.16  | 3.39E-02 | 1E+00    | 2DPI_iCoV2 + Alum |
| <b>olfactory receptor activity</b>                                             | GO:0004984 | 1169  | 0   | 4.04   | - | < 0.01 | 3.46E-02 | 1E+00    | 2DPI_iCoV2 + Alum |
| <b>cyclase activator activity</b>                                              | GO:0010853 | 10    | 1   | 0.03   | + | 28.94  | 3.72E-02 | 1E+00    | 2DPI_iCoV2 + Alum |
| <b>thioesterase binding</b>                                                    | GO:0031996 | 10    | 1   | 0.03   | + | 28.94  | 3.72E-02 | 1E+00    | 2DPI_iCoV2 + Alum |
| <b>secondary active sulfate transmembrane transporter activity</b>             | GO:0008271 | 10    | 1   | 0.03   | + | 28.94  | 3.72E-02 | 1E+00    | 2DPI_iCoV2 + Alum |
| <b>oxalate transmembrane transporter activity</b>                              | GO:0019531 | 10    | 1   | 0.03   | + | 28.94  | 3.72E-02 | 1E+00    | 2DPI_iCoV2 + Alum |
| <b>hydrolase activity</b>                                                      | GO:0016787 | 2363  | 14  | 8.16   | + | 1.71   | 3.99E-02 | 1E+00    | 2DPI_iCoV2 + Alum |
| <b>hydrolase activity, acting on carbon-nitrogen bonds, in linear amidines</b> | GO:0016813 | 11    | 1   | 0.04   | + | 26.31  | 4.06E-02 | 1E+00    | 2DPI_iCoV2 + Alum |
| <b>dioxygenase activity</b>                                                    | GO:0051213 | 94    | 2   | 0.32   | + | 6.16   | 4.33E-02 | 1E+00    | 2DPI_iCoV2 + Alum |
| <b>acetylcholine binding</b>                                                   | GO:0042166 | 12    | 1   | 0.04   | + | 24.12  | 4.39E-02 | 1E+00    | 2DPI_iCoV2 + Alum |
| <b>omega peptidase activity</b>                                                | GO:0008242 | 12    | 1   | 0.04   | + | 24.12  | 4.39E-02 | 1E+00    | 2DPI_iCoV2 + Alum |
| <b>cytokine receptor activity</b>                                              | GO:0004896 | 95    | 2   | 0.33   | + | 6.09   | 4.42E-02 | 1E+00    | 2DPI_iCoV2 + Alum |
| <b>chloride channel regulator activity</b>                                     | GO:0017081 | 13    | 1   | 0.04   | + | 22.26  | 4.72E-02 | 1E+00    | 2DPI_iCoV2 + Alum |
| <b>catecholamine binding</b>                                                   | GO:1901338 | 13    | 1   | 0.04   | + | 22.26  | 4.72E-02 | 1E+00    | 2DPI_iCoV2 + Alum |
| <b>hydrolase activity, hydrolyzing O-glycosyl compounds</b>                    | GO:0004553 | 100   | 2   | 0.35   | + | 5.79   | 4.83E-02 | 1E+00    | 2DPI_iCoV2 + Alum |
| <b>ATPase binding</b>                                                          | GO:0051117 | 100   | 2   | 0.35   | + | 5.79   | 4.83E-02 | 1E+00    | 2DPI_iCoV2 + Alum |
| <b>olfactory receptor activity</b>                                             | GO:0004984 | 1169  | 0   | 15.04  | - | < 0.01 | 5.17E-07 | 2.58E-03 | 5DPI_iCoV2 + RIBI |
| <b>structural constituent of muscle</b>                                        | GO:0008307 | 21    | 6   | 0.27   | + | 22.21  | 9.42E-07 | 2.35E-03 | 5DPI_iCoV2 + RIBI |
| <b>actinin binding</b>                                                         | GO:0042805 | 41    | 7   | 0.53   | + | 13.27  | 2.34E-06 | 3.89E-03 | 5DPI_iCoV2 + RIBI |
| <b>actin binding</b>                                                           | GO:0003779 | 448   | 20  | 5.76   | + | 3.47   | 2.6E-06  | 3.24E-03 | 5DPI_iCoV2 + RIBI |
| <b>alpha-actinin binding</b>                                                   | GO:0051393 | 30    | 6   | 0.39   | + | 15.55  | 5.63E-06 | 5.62E-03 | 5DPI_iCoV2 + RIBI |
| <b>cytoskeletal protein binding</b>                                            | GO:0008092 | 1021  | 31  | 13.14  | + | 2.36   | 1.35E-05 | 1.12E-02 | 5DPI_iCoV2 + RIBI |
| <b>carboxylic acid binding</b>                                                 | GO:0031406 | 217   | 12  | 2.79   | + | 4.3    | 3.93E-05 | 2.8E-02  | 5DPI_iCoV2 + RIBI |
| <b>titin binding</b>                                                           | GO:0031432 | 12    | 4   | 0.15   | + | 25.91  | 4.11E-05 | 2.57E-02 | 5DPI_iCoV2 + RIBI |
| <b>binding</b>                                                                 | GO:0005488 | 14105 | 214 | 181.47 | + | 1.18   | 4.59E-05 | 2.55E-02 | 5DPI_iCoV2 + RIBI |
| <b>potassium channel activity</b>                                              | GO:0005267 | 122   | 9   | 1.57   | + | 5.73   | 4.64E-05 | 2.32E-02 | 5DPI_iCoV2 + RIBI |
| <b>structural molecule activity</b>                                            | GO:0005198 | 652   | 22  | 8.39   | + | 2.62   | 5.56E-05 | 2.52E-02 | 5DPI_iCoV2 + RIBI |
| <b>potassium ion transmembrane transporter activity</b>                        | GO:0015079 | 160   | 10  | 2.06   | + | 4.86   | 6.64E-05 | 2.76E-02 | 5DPI_iCoV2 + RIBI |
| <b>muscle alpha-actinin binding</b>                                            | GO:0051371 | 14    | 4   | 0.18   | + | 22.21  | 6.78E-05 | 2.6E-02  | 5DPI_iCoV2 + RIBI |

|                                                               |            |      |     |        |   |       |          |          |                   |
|---------------------------------------------------------------|------------|------|-----|--------|---|-------|----------|----------|-------------------|
| metal ion transmembrane transporter activity                  | GO:0046873 | 436  | 17  | 5.61   | + | 3.03  | 7.54E-05 | 2.51E-02 | 5DPI_iCoV2 + RIBI |
| organic acid binding                                          | GO:0043177 | 233  | 12  | 3      | + | 4     | 7.54E-05 | 2.69E-02 | 5DPI_iCoV2 + RIBI |
| inorganic cation transmembrane transporter activity           | GO:0022890 | 533  | 19  | 6.86   | + | 2.77  | 9.05E-05 | 2.82E-02 | 5DPI_iCoV2 + RIBI |
| calcium ion binding                                           | GO:0005509 | 631  | 21  | 8.12   | + | 2.59  | 9.89E-05 | 2.9E-02  | 5DPI_iCoV2 + RIBI |
| FATZ binding                                                  | GO:0051373 | 5    | 3   | 0.06   | + | 46.64 | 1.08E-04 | 3E-02    | 5DPI_iCoV2 + RIBI |
| signaling receptor regulator activity                         | GO:0030545 | 591  | 20  | 7.6    | + | 2.63  | 1.17E-04 | 3.07E-02 | 5DPI_iCoV2 + RIBI |
| aryl sulfotransferase activity                                | GO:0004062 | 6    | 3   | 0.08   | + | 38.86 | 1.61E-04 | 4.02E-02 | 5DPI_iCoV2 + RIBI |
| sodium channel regulator activity                             | GO:0017080 | 36   | 5   | 0.46   | + | 10.8  | 1.64E-04 | 3.91E-02 | 5DPI_iCoV2 + RIBI |
| fatty acid binding                                            | GO:0005504 | 60   | 6   | 0.77   | + | 7.77  | 1.91E-04 | 4.33E-02 | 5DPI_iCoV2 + RIBI |
| monoatomic cation transmembrane transporter activity          | GO:0008324 | 572  | 19  | 7.36   | + | 2.58  | 2.17E-04 | 4.71E-02 | 5DPI_iCoV2 + RIBI |
| ion binding                                                   | GO:0043167 | 5378 | 97  | 69.19  | + | 1.4   | 2.2E-04  | 4.58E-02 | 5DPI_iCoV2 + RIBI |
| telethonin binding                                            | GO:0031433 | 7    | 3   | 0.09   | + | 33.31 | 2.28E-04 | 4.55E-02 | 5DPI_iCoV2 + RIBI |
| monoatomic ion gated channel activity                         | GO:0022839 | 315  | 13  | 4.05   | + | 3.21  | 3.13E-04 | 6.01E-02 | 5DPI_iCoV2 + RIBI |
| voltage-gated monoatomic ion channel activity                 | GO:0005244 | 197  | 10  | 2.53   | + | 3.95  | 3.32E-04 | 6.14E-02 | 5DPI_iCoV2 + RIBI |
| voltage-gated channel activity                                | GO:0022832 | 198  | 10  | 2.55   | + | 3.93  | 3.45E-04 | 6.15E-02 | 5DPI_iCoV2 + RIBI |
| gated channel activity                                        | GO:0022836 | 320  | 13  | 4.12   | + | 3.16  | 3.61E-04 | 6.22E-02 | 5DPI_iCoV2 + RIBI |
| voltage-gated potassium channel activity                      | GO:0005249 | 97   | 7   | 1.25   | + | 5.61  | 3.68E-04 | 6.13E-02 | 5DPI_iCoV2 + RIBI |
| inorganic molecular entity transmembrane transporter activity | GO:0015318 | 651  | 20  | 8.38   | + | 2.39  | 5.61E-04 | 9.03E-02 | 5DPI_iCoV2 + RIBI |
| receptor ligand activity                                      | GO:0048018 | 534  | 17  | 6.87   | + | 2.47  | 7.34E-04 | 1.14E-01 | 5DPI_iCoV2 + RIBI |
| protein binding                                               | GO:0005515 | 9462 | 150 | 121.73 | + | 1.23  | 8.69E-04 | 1.31E-01 | 5DPI_iCoV2 + RIBI |
| signaling receptor activator activity                         | GO:0030546 | 545  | 17  | 7.01   | + | 2.42  | 9.12E-04 | 1.34E-01 | 5DPI_iCoV2 + RIBI |
| L-threonine ammonia-lyase activity                            | GO:0004794 | 2    | 2   | 0.03   | + | 77.73 | 9.49E-04 | 1.25E-01 | 5DPI_iCoV2 + RIBI |
| CCR7 chemokine receptor binding                               | GO:0031732 | 2    | 2   | 0.03   | + | 77.73 | 9.49E-04 | 1.28E-01 | 5DPI_iCoV2 + RIBI |
| iron ion transmembrane transporter inhibitor activity         | GO:0097690 | 2    | 2   | 0.03   | + | 77.73 | 9.49E-04 | 1.32E-01 | 5DPI_iCoV2 + RIBI |
| titin Z domain binding                                        | GO:0070080 | 2    | 2   | 0.03   | + | 77.73 | 9.49E-04 | 1.35E-01 | 5DPI_iCoV2 + RIBI |
| monooxygenase activity                                        | GO:0004497 | 151  | 8   | 1.94   | + | 4.12  | 9.97E-04 | 1.28E-01 | 5DPI_iCoV2 + RIBI |
| monoatomic ion transmembrane transporter activity             | GO:0015075 | 700  | 20  | 9.01   | + | 2.22  | 1.04E-03 | 1.29E-01 | 5DPI_iCoV2 + RIBI |
| monoatomic cation channel activity                            | GO:0005261 | 322  | 12  | 4.14   | + | 2.9   | 1.24E-03 | 1.51E-01 | 5DPI_iCoV2 + RIBI |

|                                                                        |            |      |    |       |   |        |          |          |                   |
|------------------------------------------------------------------------|------------|------|----|-------|---|--------|----------|----------|-------------------|
| <b>monocarboxylic acid binding</b>                                     | GO:0033293 | 88   | 6  | 1.13  | + | 5.3    | 1.27E-03 | 1.51E-01 | 5DPI_iCoV2 + RIBI |
| <b>troponin C binding</b>                                              | GO:0030172 | 3    | 2  | 0.04  | + | 51.82  | 1.57E-03 | 1.78E-01 | 5DPI_iCoV2 + RIBI |
| <b>L-serine ammonia-lyase activity</b>                                 | GO:0003941 | 3    | 2  | 0.04  | + | 51.82  | 1.57E-03 | 1.82E-01 | 5DPI_iCoV2 + RIBI |
| <b>monoatomic ion channel activity</b>                                 | GO:0005216 | 435  | 14 | 5.6   | + | 2.5    | 1.92E-03 | 2.13E-01 | 5DPI_iCoV2 + RIBI |
| <b>lipid binding</b>                                                   | GO:0008289 | 886  | 23 | 11.4  | + | 2.02   | 2.01E-03 | 2.18E-01 | 5DPI_iCoV2 + RIBI |
| <b>metal ion binding</b>                                               | GO:0046872 | 3634 | 67 | 46.75 | + | 1.43   | 2.16E-03 | 2.29E-01 | 5DPI_iCoV2 + RIBI |
| <b>transporter activity</b>                                            | GO:0005215 | 1185 | 28 | 15.25 | + | 1.84   | 2.18E-03 | 2.27E-01 | 5DPI_iCoV2 + RIBI |
| <b>salt transmembrane transporter activity</b>                         | GO:1901702 | 582  | 17 | 7.49  | + | 2.27   | 2.23E-03 | 2.27E-01 | 5DPI_iCoV2 + RIBI |
| <b>transmembrane receptor protein serine/threonine kinase activity</b> | GO:0004675 | 18   | 3  | 0.23  | + | 12.95  | 2.28E-03 | 2.27E-01 | 5DPI_iCoV2 + RIBI |
| <b>oleic acid binding</b>                                              | GO:0070538 | 4    | 2  | 0.05  | + | 38.86  | 2.33E-03 | 2.28E-01 | 5DPI_iCoV2 + RIBI |
| <b>ion channel regulator activity</b>                                  | GO:0099106 | 136  | 7  | 1.75  | + | 4      | 2.39E-03 | 2.29E-01 | 5DPI_iCoV2 + RIBI |
| <b>odorant binding</b>                                                 | GO:0005549 | 534  | 0  | 6.87  | - | < 0.01 | 2.41E-03 | 2.27E-01 | 5DPI_iCoV2 + RIBI |
| <b>hormone activity</b>                                                | GO:0005179 | 137  | 7  | 1.76  | + | 3.97   | 2.48E-03 | 2.29E-01 | 5DPI_iCoV2 + RIBI |
| <b>long-chain fatty acid transporter activity</b>                      | GO:0005324 | 19   | 3  | 0.24  | + | 12.27  | 2.61E-03 | 2.37E-01 | 5DPI_iCoV2 + RIBI |
| <b>actin filament binding</b>                                          | GO:0051015 | 219  | 9  | 2.82  | + | 3.19   | 2.65E-03 | 2.36E-01 | 5DPI_iCoV2 + RIBI |
| <b>scavenger receptor activity</b>                                     | GO:0005044 | 43   | 4  | 0.55  | + | 7.23   | 2.96E-03 | 2.59E-01 | 5DPI_iCoV2 + RIBI |
| <b>BMP binding</b>                                                     | GO:0036122 | 20   | 3  | 0.26  | + | 11.66  | 2.97E-03 | 2.56E-01 | 5DPI_iCoV2 + RIBI |
| <b>voltage-gated monoatomic cation channel activity</b>                | GO:0022843 | 143  | 7  | 1.84  | + | 3.8    | 3.12E-03 | 2.64E-01 | 5DPI_iCoV2 + RIBI |
| <b>structural constituent of cytoskeleton</b>                          | GO:0005200 | 73   | 5  | 0.94  | + | 5.32   | 3.17E-03 | 2.63E-01 | 5DPI_iCoV2 + RIBI |
| <b>ammonia-lyase activity</b>                                          | GO:0016841 | 5    | 2  | 0.06  | + | 31.09  | 3.24E-03 | 2.65E-01 | 5DPI_iCoV2 + RIBI |
| <b>long-chain fatty acid binding</b>                                   | GO:0036041 | 21   | 3  | 0.27  | + | 11.1   | 3.37E-03 | 2.71E-01 | 5DPI_iCoV2 + RIBI |
| <b>channel activity</b>                                                | GO:0015267 | 495  | 15 | 6.37  | + | 2.36   | 3.72E-03 | 2.9E-01  | 5DPI_iCoV2 + RIBI |
| <b>passive transmembrane transporter activity</b>                      | GO:0022803 | 495  | 15 | 6.37  | + | 2.36   | 3.72E-03 | 2.95E-01 | 5DPI_iCoV2 + RIBI |
| <b>C-acyltransferase activity</b>                                      | GO:0016408 | 22   | 3  | 0.28  | + | 10.6   | 3.79E-03 | 2.91E-01 | 5DPI_iCoV2 + RIBI |
| <b>cation binding</b>                                                  | GO:0043169 | 3732 | 67 | 48.01 | + | 1.4    | 4.08E-03 | 3.09E-01 | 5DPI_iCoV2 + RIBI |
| <b>fatty-acyl-CoA synthase activity</b>                                | GO:0004321 | 6    | 2  | 0.08  | + | 25.91  | 4.28E-03 | 3.1E-01  | 5DPI_iCoV2 + RIBI |
| <b>metal ion sequestering activity</b>                                 | GO:0140487 | 6    | 2  | 0.08  | + | 25.91  | 4.28E-03 | 3.14E-01 | 5DPI_iCoV2 + RIBI |
| <b>dinitrosyl-iron complex binding</b>                                 | GO:0035731 | 6    | 2  | 0.08  | + | 25.91  | 4.28E-03 | 3.19E-01 | 5DPI_iCoV2 + RIBI |
| <b>signaling receptor binding</b>                                      | GO:0005102 | 1650 | 35 | 21.23 | + | 1.65   | 4.31E-03 | 3.07E-01 | 5DPI_iCoV2 + RIBI |

|                                                                         |            |      |    |       |   |       |          |          |                   |
|-------------------------------------------------------------------------|------------|------|----|-------|---|-------|----------|----------|-------------------|
| <b>channel regulator activity</b>                                       | GO:0016247 | 154  | 7  | 1.98  | + | 3.53  | 4.6E-03  | 3.23E-01 | 5DPI_iCoV2 + RIBI |
| <b>transferase activity, transferring sulphur-containing groups</b>     | GO:0016782 | 81   | 5  | 1.04  | + | 4.8   | 4.81E-03 | 3.34E-01 | 5DPI_iCoV2 + RIBI |
| <b>cargo receptor activity</b>                                          | GO:0038024 | 82   | 5  | 1.05  | + | 4.74  | 5.05E-03 | 3.46E-01 | 5DPI_iCoV2 + RIBI |
| <b>transferase activity</b>                                             | GO:0016740 | 2239 | 44 | 28.81 | + | 1.53  | 5.44E-03 | 3.67E-01 | 5DPI_iCoV2 + RIBI |
| <b>extracellularly glutamate-gated ion channel activity</b>             | GO:0005234 | 7    | 2  | 0.09  | + | 22.21 | 5.46E-03 | 3.54E-01 | 5DPI_iCoV2 + RIBI |
| <b>BMP receptor activity</b>                                            | GO:0098821 | 7    | 2  | 0.09  | + | 22.21 | 5.46E-03 | 3.58E-01 | 5DPI_iCoV2 + RIBI |
| <b>medium-chain fatty acid-CoA ligase activity</b>                      | GO:0031956 | 7    | 2  | 0.09  | + | 22.21 | 5.46E-03 | 3.63E-01 | 5DPI_iCoV2 + RIBI |
| <b>sodium ion transmembrane transporter activity</b>                    | GO:0015081 | 160  | 7  | 2.06  | + | 3.4   | 5.6E-03  | 3.58E-01 | 5DPI_iCoV2 + RIBI |
| <b>delayed rectifier potassium channel activity</b>                     | GO:0005251 | 26   | 3  | 0.33  | + | 8.97  | 5.8E-03  | 3.62E-01 | 5DPI_iCoV2 + RIBI |
| <b>actin monomer binding</b>                                            | GO:0003785 | 26   | 3  | 0.33  | + | 8.97  | 5.8E-03  | 3.67E-01 | 5DPI_iCoV2 + RIBI |
| <b>transmembrane transporter binding</b>                                | GO:0044325 | 162  | 7  | 2.08  | + | 3.36  | 5.97E-03 | 3.68E-01 | 5DPI_iCoV2 + RIBI |
| <b>sulfur compound binding</b>                                          | GO:1901681 | 297  | 10 | 3.82  | + | 2.62  | 6.12E-03 | 3.73E-01 | 5DPI_iCoV2 + RIBI |
| <b>transmembrane signaling receptor activity</b>                        | GO:0004888 | 2203 | 15 | 28.34 | - | 0.53  | 6.69E-03 | 4.02E-01 | 5DPI_iCoV2 + RIBI |
| <b>NAD<sup>+</sup>-protein-arginine ADP-ribosyltransferase activity</b> | GO:0106274 | 8    | 2  | 0.1   | + | 19.43 | 6.76E-03 | 3.97E-01 | 5DPI_iCoV2 + RIBI |
| <b>D-glucose transmembrane transporter activity</b>                     | GO:0055056 | 8    | 2  | 0.1   | + | 19.43 | 6.76E-03 | 4.02E-01 | 5DPI_iCoV2 + RIBI |
| <b>lipase activity</b>                                                  | GO:0016298 | 127  | 6  | 1.63  | + | 3.67  | 7.13E-03 | 4.14E-01 | 5DPI_iCoV2 + RIBI |
| <b>identical protein binding</b>                                        | GO:0042802 | 2410 | 46 | 31.01 | + | 1.48  | 7.2E-03  | 4.13E-01 | 5DPI_iCoV2 + RIBI |
| <b>uniporter activity</b>                                               | GO:0015292 | 9    | 2  | 0.12  | + | 17.27 | 8.2E-03  | 4.6E-01  | 5DPI_iCoV2 + RIBI |
| <b>butyrate-CoA ligase activity</b>                                     | GO:0047760 | 9    | 2  | 0.12  | + | 17.27 | 8.2E-03  | 4.65E-01 | 5DPI_iCoV2 + RIBI |
| <b>sulfotransferase activity</b>                                        | GO:0008146 | 61   | 4  | 0.78  | + | 5.1   | 9.41E-03 | 5.22E-01 | 5DPI_iCoV2 + RIBI |
| <b>heparin binding</b>                                                  | GO:0008201 | 178  | 7  | 2.29  | + | 3.06  | 9.59E-03 | 5.26E-01 | 5DPI_iCoV2 + RIBI |
| <b>alcohol sulfotransferase activity</b>                                | GO:0004027 | 10   | 2  | 0.13  | + | 15.55 | 9.76E-03 | 5.29E-01 | 5DPI_iCoV2 + RIBI |
| <b>steroid delta-isomerase activity</b>                                 | GO:0004769 | 11   | 2  | 0.14  | + | 14.13 | 1.14E-02 | 6.14E-01 | 5DPI_iCoV2 + RIBI |
| <b>cytokine binding</b>                                                 | GO:0019955 | 142  | 6  | 1.83  | + | 3.28  | 1.17E-02 | 6.22E-01 | 5DPI_iCoV2 + RIBI |
| <b>extracellular matrix structural constituent</b>                      | GO:0005201 | 145  | 6  | 1.87  | + | 3.22  | 1.28E-02 | 6.75E-01 | 5DPI_iCoV2 + RIBI |
| <b>myosin heavy chain binding</b>                                       | GO:0032036 | 12   | 2  | 0.15  | + | 12.95 | 1.32E-02 | 6.81E-01 | 5DPI_iCoV2 + RIBI |
| <b>aromatase activity</b>                                               | GO:0070330 | 36   | 3  | 0.46  | + | 6.48  | 1.32E-02 | 6.88E-01 | 5DPI_iCoV2 + RIBI |
| <b>microfilament motor activity</b>                                     | GO:0000146 | 37   | 3  | 0.48  | + | 6.3   | 1.42E-02 | 7.22E-01 | 5DPI_iCoV2 + RIBI |
| <b>glycosaminoglycan binding</b>                                        | GO:0005539 | 240  | 8  | 3.09  | + | 2.59  | 1.43E-02 | 7.14E-01 | 5DPI_iCoV2 + RIBI |

|                                                                                                                                                                                             |            |      |    |       |   |        |          |          |                   |
|---------------------------------------------------------------------------------------------------------------------------------------------------------------------------------------------|------------|------|----|-------|---|--------|----------|----------|-------------------|
| lyase activity                                                                                                                                                                              | GO:0016829 | 193  | 7  | 2.48  | + | 2.82   | 1.43E-02 | 7.19E-01 | 5DPI_iCoV2 + RIBI |
| oxidoreductase activity                                                                                                                                                                     | GO:0016491 | 769  | 18 | 9.89  | + | 1.82   | 1.45E-02 | 7.11E-01 | 5DPI_iCoV2 + RIBI |
| growth factor activity                                                                                                                                                                      | GO:0008083 | 149  | 6  | 1.92  | + | 3.13   | 1.45E-02 | 7.14E-01 | 5DPI_iCoV2 + RIBI |
| metal cation:monoatomic cation antiporter activity                                                                                                                                          | GO:0140828 | 38   | 3  | 0.49  | + | 6.14   | 1.51E-02 | 7.2E-01  | 5DPI_iCoV2 + RIBI |
| azole transmembrane transporter activity                                                                                                                                                    | GO:1901474 | 13   | 2  | 0.17  | + | 11.96  | 1.51E-02 | 7.26E-01 | 5DPI_iCoV2 + RIBI |
| carbon-nitrogen lyase activity                                                                                                                                                              | GO:0016840 | 13   | 2  | 0.17  | + | 11.96  | 1.51E-02 | 7.33E-01 | 5DPI_iCoV2 + RIBI |
| nucleic acid binding                                                                                                                                                                        | GO:0003676 | 3371 | 29 | 43.37 | - | 0.67   | 1.58E-02 | 7.45E-01 | 5DPI_iCoV2 + RIBI |
| L-glutamate transmembrane transporter activity                                                                                                                                              | GO:0005313 | 14   | 2  | 0.18  | + | 11.1   | 1.72E-02 | 7.93E-01 | 5DPI_iCoV2 + RIBI |
| tropomyosin binding                                                                                                                                                                         | GO:0005523 | 14   | 2  | 0.18  | + | 11.1   | 1.72E-02 | 8E-01    | 5DPI_iCoV2 + RIBI |
| transmembrane transporter activity                                                                                                                                                          | GO:0022857 | 1077 | 23 | 13.86 | + | 1.66   | 1.81E-02 | 8.31E-01 | 5DPI_iCoV2 + RIBI |
| transmembrane receptor protein kinase activity                                                                                                                                              | GO:0019199 | 76   | 4  | 0.98  | + | 4.09   | 1.9E-02  | 8.61E-01 | 5DPI_iCoV2 + RIBI |
| RNA binding                                                                                                                                                                                 | GO:0003723 | 1113 | 6  | 14.32 | - | 0.42   | 1.94E-02 | 8.71E-01 | 5DPI_iCoV2 + RIBI |
| catalytic activity                                                                                                                                                                          | GO:0003824 | 5563 | 89 | 71.57 | + | 1.24   | 1.95E-02 | 8.67E-01 | 5DPI_iCoV2 + RIBI |
| oxidoreductase activity, acting on paired donors, with incorporation or reduction of molecular oxygen, reduced flavin or flavoprotein as one donor, and incorporation of one atom of oxygen | GO:0016712 | 78   | 4  | 1     | + | 3.99   | 2.06E-02 | 9.09E-01 | 5DPI_iCoV2 + RIBI |
| signaling receptor activity                                                                                                                                                                 | GO:0038023 | 2418 | 19 | 31.11 | - | 0.61   | 2.1E-02  | 9.1E-01  | 5DPI_iCoV2 + RIBI |
| molecular transducer activity                                                                                                                                                               | GO:0060089 | 2418 | 19 | 31.11 | - | 0.61   | 2.1E-02  | 9.18E-01 | 5DPI_iCoV2 + RIBI |
| sodium channel activity                                                                                                                                                                     | GO:0005272 | 44   | 3  | 0.57  | + | 5.3    | 2.18E-02 | 9.38E-01 | 5DPI_iCoV2 + RIBI |
| carboxylic ester hydrolase activity                                                                                                                                                         | GO:0052689 | 165  | 6  | 2.12  | + | 2.83   | 2.23E-02 | 9.51E-01 | 5DPI_iCoV2 + RIBI |
| voltage-gated monoatomic ion channel activity involved in regulation of presynaptic membrane potential                                                                                      | GO:0099508 | 17   | 2  | 0.22  | + | 9.14   | 2.38E-02 | 1E+00    | 5DPI_iCoV2 + RIBI |
| amide transmembrane transporter activity                                                                                                                                                    | GO:0042887 | 46   | 3  | 0.59  | + | 5.07   | 2.43E-02 | 1E+00    | 5DPI_iCoV2 + RIBI |
| ubiquitin protein ligase binding                                                                                                                                                            | GO:0031625 | 335  | 0  | 4.31  | - | < 0.01 | 2.43E-02 | 1E+00    | 5DPI_iCoV2 + RIBI |
| protein homodimerization activity                                                                                                                                                           | GO:0042803 | 803  | 18 | 10.33 | + | 1.74   | 2.45E-02 | 1E+00    | 5DPI_iCoV2 + RIBI |
| L-asparagine, sodium:proton antiporter activity                                                                                                                                             | GO:0140831 | 1    | 1  | 0.01  | + | 77.73  | 2.52E-02 | 8.4E-01  | 5DPI_iCoV2 + RIBI |
| L-histidine, sodium:proton antiporter activity                                                                                                                                              | GO:0140832 | 1    | 1  | 0.01  | + | 77.73  | 2.52E-02 | 8.46E-01 | 5DPI_iCoV2 + RIBI |
| L-tyrosine:2-oxoglutarate aminotransferase activity                                                                                                                                         | GO:0004838 | 1    | 1  | 0.01  | + | 77.73  | 2.52E-02 | 8.51E-01 | 5DPI_iCoV2 + RIBI |
| asialoglycoprotein receptor activity                                                                                                                                                        | GO:0004873 | 1    | 1  | 0.01  | + | 77.73  | 2.52E-02 | 8.57E-01 | 5DPI_iCoV2 + RIBI |
| insulin-responsive glucose:proton symporter activity                                                                                                                                        | GO:0005360 | 1    | 1  | 0.01  | + | 77.73  | 2.52E-02 | 8.63E-01 | 5DPI_iCoV2 + RIBI |

|                                                                                                                |            |     |   |      |   |        |          |          |                   |
|----------------------------------------------------------------------------------------------------------------|------------|-----|---|------|---|--------|----------|----------|-------------------|
| <b>10-hydroxy-9-octadecanoate phosphatase activity</b>                                                         | GO:0033885 | 1   | 1 | 0.01 | + | 77.73  | 2.52E-02 | 8.69E-01 | 5DPI_iCoV2 + RIBI |
| <b>mast cell secretagogue receptor activity</b>                                                                | GO:1990595 | 1   | 1 | 0.01 | + | 77.73  | 2.52E-02 | 8.75E-01 | 5DPI_iCoV2 + RIBI |
| <b>thyroid-stimulating hormone receptor activity</b>                                                           | GO:0004996 | 1   | 1 | 0.01 | + | 77.73  | 2.52E-02 | 8.81E-01 | 5DPI_iCoV2 + RIBI |
| <b>interleukin-22 binding</b>                                                                                  | GO:0042017 | 1   | 1 | 0.01 | + | 77.73  | 2.52E-02 | 8.87E-01 | 5DPI_iCoV2 + RIBI |
| <b>glucose uniporter activity</b>                                                                              | GO:0015304 | 1   | 1 | 0.01 | + | 77.73  | 2.52E-02 | 8.94E-01 | 5DPI_iCoV2 + RIBI |
| <b>sodium:inorganic phosphate symporter activity</b>                                                           | GO:0015319 | 1   | 1 | 0.01 | + | 77.73  | 2.52E-02 | 9E-01    | 5DPI_iCoV2 + RIBI |
| <b>L-tyrosine aminotransferase activity</b>                                                                    | GO:0070547 | 1   | 1 | 0.01 | + | 77.73  | 2.52E-02 | 9.06E-01 | 5DPI_iCoV2 + RIBI |
| <b>hydroperoxy icosatetraenoate isomerase activity</b>                                                         | GO:0106255 | 1   | 1 | 0.01 | + | 77.73  | 2.52E-02 | 9.13E-01 | 5DPI_iCoV2 + RIBI |
| <b>protein serine kinase activity</b>                                                                          | GO:0106264 | 1   | 1 | 0.01 | + | 77.73  | 2.52E-02 | 9.2E-01  | 5DPI_iCoV2 + RIBI |
| <b>secondary active organic cation transmembrane transporter activity</b>                                      | GO:0008513 | 1   | 1 | 0.01 | + | 77.73  | 2.52E-02 | 9.26E-01 | 5DPI_iCoV2 + RIBI |
| <b>omega-hydroxyceramide transacylase activity</b>                                                             | GO:0106341 | 1   | 1 | 0.01 | + | 77.73  | 2.52E-02 | 9.33E-01 | 5DPI_iCoV2 + RIBI |
| <b>azole:proton antiporter activity</b>                                                                        | GO:0045119 | 1   | 1 | 0.01 | + | 77.73  | 2.52E-02 | 9.4E-01  | 5DPI_iCoV2 + RIBI |
| <b>voltage-gated potassium channel activity involved in bundle of His cell action potential repolarization</b> | GO:0086087 | 1   | 1 | 0.01 | + | 77.73  | 2.52E-02 | 9.47E-01 | 5DPI_iCoV2 + RIBI |
| <b>voltage-gated potassium channel activity involved in SA node cell action potential repolarization</b>       | GO:0086090 | 1   | 1 | 0.01 | + | 77.73  | 2.52E-02 | 9.54E-01 | 5DPI_iCoV2 + RIBI |
| <b>glycerophosphoinositol inositolphosphodiesterase activity</b>                                               | GO:0047394 | 1   | 1 | 0.01 | + | 77.73  | 2.52E-02 | 9.62E-01 | 5DPI_iCoV2 + RIBI |
| <b>L-gulonolactone oxidase activity</b>                                                                        | GO:0050105 | 1   | 1 | 0.01 | + | 77.73  | 2.52E-02 | 9.69E-01 | 5DPI_iCoV2 + RIBI |
| <b>D-arabinono-1,4-lactone oxidase activity</b>                                                                | GO:0003885 | 1   | 1 | 0.01 | + | 77.73  | 2.52E-02 | 9.77E-01 | 5DPI_iCoV2 + RIBI |
| <b>calcium ion sequestering activity</b>                                                                       | GO:0140314 | 1   | 1 | 0.01 | + | 77.73  | 2.52E-02 | 9.84E-01 | 5DPI_iCoV2 + RIBI |
| <b>4-nitrophenol 2-monooxygenase activity</b>                                                                  | GO:0018601 | 1   | 1 | 0.01 | + | 77.73  | 2.52E-02 | 9.92E-01 | 5DPI_iCoV2 + RIBI |
| <b>glycosylphosphatidylinositol phospholipase D activity</b>                                                   | GO:0004621 | 1   | 1 | 0.01 | + | 77.73  | 2.52E-02 | 1E+00    | 5DPI_iCoV2 + RIBI |
| <b>intramolecular transferase activity, transferring hydroxy groups</b>                                        | GO:0050486 | 1   | 1 | 0.01 | + | 77.73  | 2.52E-02 | 1E+00    | 5DPI_iCoV2 + RIBI |
| <b>propionate CoA-transferase activity</b>                                                                     | GO:0018729 | 1   | 1 | 0.01 | + | 77.73  | 2.52E-02 | 1E+00    | 5DPI_iCoV2 + RIBI |
| <b>thiol S-methyltransferase activity</b>                                                                      | GO:0018708 | 1   | 1 | 0.01 | + | 77.73  | 2.52E-02 | 1E+00    | 5DPI_iCoV2 + RIBI |
| <b>albendazole monooxygenase activity</b>                                                                      | GO:0047638 | 1   | 1 | 0.01 | + | 77.73  | 2.52E-02 | 1E+00    | 5DPI_iCoV2 + RIBI |
| <b>ubiquitin-like protein ligase binding</b>                                                                   | GO:0044389 | 352 | 0 | 4.53 | - | < 0.01 | 2.57E-02 | 8.5E-01  | 5DPI_iCoV2 + RIBI |
| <b>neurotransmitter transmembrane transporter activity</b>                                                     | GO:0005326 | 18  | 2 | 0.23 | + | 8.64   | 2.63E-02 | 8.52E-01 | 5DPI_iCoV2 + RIBI |

|                                                                                                                                                                          |              |       |     |        |   |        |          |          |                   |
|--------------------------------------------------------------------------------------------------------------------------------------------------------------------------|--------------|-------|-----|--------|---|--------|----------|----------|-------------------|
| <b>transmembrane receptor protein tyrosine kinase activator activity</b>                                                                                                 | GO:0030297   | 18    | 2   | 0.23   | + | 8.64   | 2.63E-02 | 8.57E-01 | 5DPI_iCoV2 + RIBI |
| <b>glutathione binding</b>                                                                                                                                               | GO:0043295   | 18    | 2   | 0.23   | + | 8.64   | 2.63E-02 | 8.63E-01 | 5DPI_iCoV2 + RIBI |
| <b>molecular_function</b>                                                                                                                                                | GO:0003674   | 20579 | 274 | 264.76 | + | 1.03   | 2.67E-02 | 8.53E-01 | 5DPI_iCoV2 + RIBI |
| <b>Unclassified</b>                                                                                                                                                      | UNCLASSIFIED | 1418  | 9   | 18.24  | - | 0.49   | 2.67E-02 | 8.59E-01 | 5DPI_iCoV2 + RIBI |
| <b>arachidonic acid epoxygenase activity</b>                                                                                                                             | GO:0008392   | 48    | 3   | 0.62   | + | 4.86   | 2.7E-02  | 8.58E-01 | 5DPI_iCoV2 + RIBI |
| <b>antioxidant activity</b>                                                                                                                                              | GO:0016209   | 86    | 4   | 1.11   | + | 3.62   | 2.78E-02 | 8.79E-01 | 5DPI_iCoV2 + RIBI |
| <b>triglyceride lipase activity</b>                                                                                                                                      | GO:0004806   | 19    | 2   | 0.24   | + | 8.18   | 2.88E-02 | 8.98E-01 | 5DPI_iCoV2 + RIBI |
| <b>acidic amino acid transmembrane transporter activity</b>                                                                                                              | GO:0015172   | 19    | 2   | 0.24   | + | 8.18   | 2.88E-02 | 9.04E-01 | 5DPI_iCoV2 + RIBI |
| <b>scaffold protein binding</b>                                                                                                                                          | GO:0097110   | 89    | 4   | 1.15   | + | 3.49   | 3.09E-02 | 9.57E-01 | 5DPI_iCoV2 + RIBI |
| <b>arachidonic acid monooxygenase activity</b>                                                                                                                           | GO:0008391   | 51    | 3   | 0.66   | + | 4.57   | 3.13E-02 | 9.63E-01 | 5DPI_iCoV2 + RIBI |
| <b>oxidoreductase activity, acting on paired donors, with incorporation or reduction of molecular oxygen</b>                                                             | GO:0016705   | 229   | 7   | 2.95   | + | 2.38   | 3.16E-02 | 9.69E-01 | 5DPI_iCoV2 + RIBI |
| <b>lipid transporter activity</b>                                                                                                                                        | GO:0005319   | 181   | 6   | 2.33   | + | 2.58   | 3.26E-02 | 9.92E-01 | 5DPI_iCoV2 + RIBI |
| <b>acyltransferase activity, transferring groups other than amino-acyl groups</b>                                                                                        | GO:0016747   | 231   | 7   | 2.97   | + | 2.36   | 3.29E-02 | 9.95E-01 | 5DPI_iCoV2 + RIBI |
| <b>calcium-dependent protein binding</b>                                                                                                                                 | GO:0048306   | 91    | 4   | 1.17   | + | 3.42   | 3.3E-02  | 9.93E-01 | 5DPI_iCoV2 + RIBI |
| <b>anion binding</b>                                                                                                                                                     | GO:0043168   | 2371  | 42  | 30.5   | + | 1.38   | 3.38E-02 | 1E+00    | 5DPI_iCoV2 + RIBI |
| <b>fatty acid ligase activity</b>                                                                                                                                        | GO:0015645   | 21    | 2   | 0.27   | + | 7.4    | 3.41E-02 | 1E+00    | 5DPI_iCoV2 + RIBI |
| <b>pyridoxal phosphate binding</b>                                                                                                                                       | GO:0030170   | 53    | 3   | 0.68   | + | 4.4    | 3.43E-02 | 1E+00    | 5DPI_iCoV2 + RIBI |
| <b>vitamin B6 binding</b>                                                                                                                                                | GO:0070279   | 54    | 3   | 0.69   | + | 4.32   | 3.59E-02 | 1E+00    | 5DPI_iCoV2 + RIBI |
| <b>protein heterodimerization activity</b>                                                                                                                               | GO:0046982   | 303   | 0   | 3.9    | - | < 0.01 | 3.61E-02 | 1E+00    | 5DPI_iCoV2 + RIBI |
| <b>phosphatidylinositol-5-phosphate binding</b>                                                                                                                          | GO:0010314   | 22    | 2   | 0.28   | + | 7.07   | 3.69E-02 | 1E+00    | 5DPI_iCoV2 + RIBI |
| <b>intramolecular oxidoreductase activity, transposing C=C bonds</b>                                                                                                     | GO:0016863   | 22    | 2   | 0.28   | + | 7.07   | 3.69E-02 | 1E+00    | 5DPI_iCoV2 + RIBI |
| <b>oxidoreductase activity, acting on paired donors, with incorporation or reduction of molecular oxygen, NADH as one donor, and incorporation of one atom of oxygen</b> | GO:0016709   | 55    | 3   | 0.71   | + | 4.24   | 3.75E-02 | 1E+00    | 5DPI_iCoV2 + RIBI |
| <b>phosphate ion uniporter activity</b>                                                                                                                                  | GO:0140787   | 2     | 1   | 0.03   | + | 38.86  | 3.76E-02 | 9.48E-01 | 5DPI_iCoV2 + RIBI |
| <b>ferritin receptor activity</b>                                                                                                                                        | GO:0070287   | 2     | 1   | 0.03   | + | 38.86  | 3.76E-02 | 9.53E-01 | 5DPI_iCoV2 + RIBI |
| <b>L-glutamine, sodium:proton antiporter activity</b>                                                                                                                    | GO:0140830   | 2     | 1   | 0.03   | + | 38.86  | 3.76E-02 | 9.58E-01 | 5DPI_iCoV2 + RIBI |
| <b>hepoxilin A3 synthase activity</b>                                                                                                                                    | GO:0051120   | 2     | 1   | 0.03   | + | 38.86  | 3.76E-02 | 9.63E-01 | 5DPI_iCoV2 + RIBI |

|                                                                                                     |            |     |   |      |   |       |          |          |                   |
|-----------------------------------------------------------------------------------------------------|------------|-----|---|------|---|-------|----------|----------|-------------------|
| <b>interleukin-8 receptor activity</b>                                                              | GO:0004918 | 2   | 1 | 0.03 | + | 38.86 | 3.76E-02 | 9.68E-01 | 5DPI_iCoV2 + RIBI |
| <b>extracellularly glutamate-gated chloride channel activity</b>                                    | GO:0008068 | 2   | 1 | 0.03 | + | 38.86 | 3.76E-02 | 9.73E-01 | 5DPI_iCoV2 + RIBI |
| <b>corticotropin hormone receptor binding</b>                                                       | GO:0031780 | 2   | 1 | 0.03 | + | 38.86 | 3.76E-02 | 9.78E-01 | 5DPI_iCoV2 + RIBI |
| <b>type 5 melanocortin receptor binding</b>                                                         | GO:0031783 | 2   | 1 | 0.03 | + | 38.86 | 3.76E-02 | 9.83E-01 | 5DPI_iCoV2 + RIBI |
| <b>chemoattractant activity involved in axon guidance</b>                                           | GO:1902379 | 2   | 1 | 0.03 | + | 38.86 | 3.76E-02 | 9.88E-01 | 5DPI_iCoV2 + RIBI |
| <b>coumarin 7-hydroxylase activity</b>                                                              | GO:0008389 | 2   | 1 | 0.03 | + | 38.86 | 3.76E-02 | 9.94E-01 | 5DPI_iCoV2 + RIBI |
| <b>monoatomic ion antiporter activity involved in regulation of postsynaptic membrane potential</b> | GO:0099580 | 2   | 1 | 0.03 | + | 38.86 | 3.76E-02 | 9.99E-01 | 5DPI_iCoV2 + RIBI |
| <b>phosphoenolpyruvate carboxykinase activity</b>                                                   | GO:0004613 | 2   | 1 | 0.03 | + | 38.86 | 3.76E-02 | 1E+00    | 5DPI_iCoV2 + RIBI |
| <b>phosphoenolpyruvate carboxykinase activity</b>                                                   | GO:0004611 | 2   | 1 | 0.03 | + | 38.86 | 3.76E-02 | 1E+00    | 5DPI_iCoV2 + RIBI |
| <b>tryptophan 5-monooxygenase activity</b>                                                          | GO:0004510 | 2   | 1 | 0.03 | + | 38.86 | 3.76E-02 | 1E+00    | 5DPI_iCoV2 + RIBI |
| <b>zinc ion sequestering activity</b>                                                               | GO:0140486 | 2   | 1 | 0.03 | + | 38.86 | 3.76E-02 | 1E+00    | 5DPI_iCoV2 + RIBI |
| <b>activin receptor antagonist activity</b>                                                         | GO:0038102 | 2   | 1 | 0.03 | + | 38.86 | 3.76E-02 | 1E+00    | 5DPI_iCoV2 + RIBI |
| <b>1-alpha,25-dihydroxyvitamin D3 23-hydroxylase activity</b>                                       | GO:0062181 | 2   | 1 | 0.03 | + | 38.86 | 3.76E-02 | 1E+00    | 5DPI_iCoV2 + RIBI |
| <b>vitamin D 23-hydroxylase activity</b>                                                            | GO:0062179 | 2   | 1 | 0.03 | + | 38.86 | 3.76E-02 | 1E+00    | 5DPI_iCoV2 + RIBI |
| <b>ADP-ribosylarginine hydrolase activity</b>                                                       | GO:0003875 | 2   | 1 | 0.03 | + | 38.86 | 3.76E-02 | 1E+00    | 5DPI_iCoV2 + RIBI |
| <b>acyl-coenzyme A diphosphatase activity</b>                                                       | GO:0106399 | 2   | 1 | 0.03 | + | 38.86 | 3.76E-02 | 1E+00    | 5DPI_iCoV2 + RIBI |
| <b>trimethylamine monooxygenase activity</b>                                                        | GO:0034899 | 2   | 1 | 0.03 | + | 38.86 | 3.76E-02 | 1E+00    | 5DPI_iCoV2 + RIBI |
| <b>glucosaminylgalactosylglucosylceramide beta-galactosyltransferase activity</b>                   | GO:0047275 | 2   | 1 | 0.03 | + | 38.86 | 3.76E-02 | 1E+00    | 5DPI_iCoV2 + RIBI |
| <b>hexose uniporter activity</b>                                                                    | GO:0008516 | 2   | 1 | 0.03 | + | 38.86 | 3.76E-02 | 1E+00    | 5DPI_iCoV2 + RIBI |
| <b>aryldialkylphosphatase activity</b>                                                              | GO:0004063 | 2   | 1 | 0.03 | + | 38.86 | 3.76E-02 | 1E+00    | 5DPI_iCoV2 + RIBI |
| <b>catalytic activity, acting on a nucleic acid</b>                                                 | GO:0140640 | 588 | 2 | 7.56 | - | 0.26  | 3.79E-02 | 9.46E-01 | 5DPI_iCoV2 + RIBI |
| <b>ribonucleoside triphosphate phosphatase activity</b>                                             | GO:0017111 | 587 | 2 | 7.55 | - | 0.26  | 3.79E-02 | 9.49E-01 | 5DPI_iCoV2 + RIBI |
| <b>phosphatidic acid binding</b>                                                                    | GO:0070300 | 23  | 2 | 0.3  | + | 6.76  | 3.98E-02 | 9.79E-01 | 5DPI_iCoV2 + RIBI |
| <b>ankyrin binding</b>                                                                              | GO:0030506 | 23  | 2 | 0.3  | + | 6.76  | 3.98E-02 | 9.84E-01 | 5DPI_iCoV2 + RIBI |
| <b>NAD+ ADP-ribosyltransferase activity</b>                                                         | GO:0003950 | 23  | 2 | 0.3  | + | 6.76  | 3.98E-02 | 9.88E-01 | 5DPI_iCoV2 + RIBI |
| <b>hydro-lyase activity</b>                                                                         | GO:0016836 | 58  | 3 | 0.75 | + | 4.02  | 4.26E-02 | 1E+00    | 5DPI_iCoV2 + RIBI |
| <b>metal cation:proton antiporter activity</b>                                                      | GO:0051139 | 24  | 2 | 0.31 | + | 6.48  | 4.28E-02 | 1E+00    | 5DPI_iCoV2 + RIBI |
| <b>NAD+-protein ADP-ribosyltransferase activity</b>                                                 | GO:1990404 | 24  | 2 | 0.31 | + | 6.48  | 4.28E-02 | 1E+00    | 5DPI_iCoV2 + RIBI |



|                                                                                                                        |            |     |   |      |   |       |          |       |                   |
|------------------------------------------------------------------------------------------------------------------------|------------|-----|---|------|---|-------|----------|-------|-------------------|
| <b>serine-type endopeptidase activity</b>                                                                              | GO:0004252 | 194 | 6 | 2.5  | + | 2.4   | 4.29E-02 | 1E+00 | 5DPI_iCoV2 + RIBI |
| <b>calmodulin binding</b>                                                                                              | GO:0005516 | 194 | 6 | 2.5  | + | 2.4   | 4.29E-02 | 1E+00 | 5DPI_iCoV2 + RIBI |
| <b>hexose transmembrane transporter activity</b>                                                                       | GO:0015149 | 25  | 2 | 0.32 | + | 6.22  | 4.58E-02 | 1E+00 | 5DPI_iCoV2 + RIBI |
| <b>glucose transmembrane transporter activity</b>                                                                      | GO:0005355 | 25  | 2 | 0.32 | + | 6.22  | 4.58E-02 | 1E+00 | 5DPI_iCoV2 + RIBI |
| <b>intramolecular transferase activity</b>                                                                             | GO:0016866 | 25  | 2 | 0.32 | + | 6.22  | 4.58E-02 | 1E+00 | 5DPI_iCoV2 + RIBI |
| <b>voltage-gated sodium channel activity</b>                                                                           | GO:0005248 | 25  | 2 | 0.32 | + | 6.22  | 4.58E-02 | 1E+00 | 5DPI_iCoV2 + RIBI |
| <b>protein kinase C binding</b>                                                                                        | GO:0005080 | 60  | 3 | 0.77 | + | 3.89  | 4.61E-02 | 1E+00 | 5DPI_iCoV2 + RIBI |
| <b>symporter activity</b>                                                                                              | GO:0015293 | 150 | 5 | 1.93 | + | 2.59  | 4.81E-02 | 1E+00 | 5DPI_iCoV2 + RIBI |
| <b>glutathione peroxidase activity</b>                                                                                 | GO:0004602 | 26  | 2 | 0.33 | + | 5.98  | 4.89E-02 | 1E+00 | 5DPI_iCoV2 + RIBI |
| <b>CoA-ligase activity</b>                                                                                             | GO:0016405 | 26  | 2 | 0.33 | + | 5.98  | 4.89E-02 | 1E+00 | 5DPI_iCoV2 + RIBI |
| <b>phosphoglycerate mutase activity</b>                                                                                | GO:0004619 | 3   | 1 | 0.04 | + | 25.91 | 4.99E-02 | 1E+00 | 5DPI_iCoV2 + RIBI |
| <b>nitrate reductase activity</b>                                                                                      | GO:0008940 | 3   | 1 | 0.04 | + | 25.91 | 4.99E-02 | 1E+00 | 5DPI_iCoV2 + RIBI |
| <b>alpha-amylase activity</b>                                                                                          | GO:0004556 | 3   | 1 | 0.04 | + | 25.91 | 4.99E-02 | 1E+00 | 5DPI_iCoV2 + RIBI |
| <b>adenosine-phosphate deaminase activity</b>                                                                          | GO:0047623 | 3   | 1 | 0.04 | + | 25.91 | 4.99E-02 | 1E+00 | 5DPI_iCoV2 + RIBI |
| <b>nitric-oxide synthase activity</b>                                                                                  | GO:0004517 | 3   | 1 | 0.04 | + | 25.91 | 4.99E-02 | 1E+00 | 5DPI_iCoV2 + RIBI |
| <b>retinol O-fatty-acyltransferase activity</b>                                                                        | GO:0050252 | 3   | 1 | 0.04 | + | 25.91 | 4.99E-02 | 1E+00 | 5DPI_iCoV2 + RIBI |
| <b>neuregulin receptor activity</b>                                                                                    | GO:0038131 | 3   | 1 | 0.04 | + | 25.91 | 4.99E-02 | 1E+00 | 5DPI_iCoV2 + RIBI |
| <b>G protein-coupled pyrimidinergic nucleotide receptor activity</b>                                                   | GO:0071553 | 3   | 1 | 0.04 | + | 25.91 | 4.99E-02 | 1E+00 | 5DPI_iCoV2 + RIBI |
| <b>glycogen synthase activity</b>                                                                                      | GO:0004373 | 3   | 1 | 0.04 | + | 25.91 | 4.99E-02 | 1E+00 | 5DPI_iCoV2 + RIBI |
| <b>AMP deaminase activity</b>                                                                                          | GO:0003876 | 3   | 1 | 0.04 | + | 25.91 | 4.99E-02 | 1E+00 | 5DPI_iCoV2 + RIBI |
| <b>acetylcholine receptor activator activity</b>                                                                       | GO:0030549 | 3   | 1 | 0.04 | + | 25.91 | 4.99E-02 | 1E+00 | 5DPI_iCoV2 + RIBI |
| <b>acyl-L-homoserine-lactone lactonohydrolase activity</b>                                                             | GO:0102007 | 3   | 1 | 0.04 | + | 25.91 | 4.99E-02 | 1E+00 | 5DPI_iCoV2 + RIBI |
| <b>voltage-gated potassium channel activity involved in atrial cardiac muscle cell action potential repolarization</b> | GO:0086089 | 3   | 1 | 0.04 | + | 25.91 | 4.99E-02 | 1E+00 | 5DPI_iCoV2 + RIBI |
| <b>zymogen binding</b>                                                                                                 | GO:0035375 | 3   | 1 | 0.04 | + | 25.91 | 4.99E-02 | 1E+00 | 5DPI_iCoV2 + RIBI |
| <b>G protein-coupled UTP receptor activity</b>                                                                         | GO:0045030 | 3   | 1 | 0.04 | + | 25.91 | 4.99E-02 | 1E+00 | 5DPI_iCoV2 + RIBI |
| <b>spermidine transmembrane transporter activity</b>                                                                   | GO:0015606 | 3   | 1 | 0.04 | + | 25.91 | 4.99E-02 | 1E+00 | 5DPI_iCoV2 + RIBI |
| <b>vitamin D3 25-hydroxylase activity</b>                                                                              | GO:0030343 | 3   | 1 | 0.04 | + | 25.91 | 4.99E-02 | 1E+00 | 5DPI_iCoV2 + RIBI |
| <b>bisphosphoglycerate mutase activity</b>                                                                             | GO:0004082 | 3   | 1 | 0.04 | + | 25.91 | 4.99E-02 | 1E+00 | 5DPI_iCoV2 + RIBI |

|                                                                                                                                 |            |      |    |       |   |       |          |          |                   |
|---------------------------------------------------------------------------------------------------------------------------------|------------|------|----|-------|---|-------|----------|----------|-------------------|
| <b>interleukin-8 binding</b>                                                                                                    | GO:0019959 | 3    | 1  | 0.04  | + | 25.91 | 4.99E-02 | 1E+00    | 5DPI_iCoV2 + RIBI |
| <b>calcium:monoatomic cation antiporter activity involved in regulation of postsynaptic cytosolic calcium ion concentration</b> | GO:1905060 | 3    | 1  | 0.04  | + | 25.91 | 4.99E-02 | 1E+00    | 5DPI_iCoV2 + RIBI |
| <b>lactonohydrolase activity</b>                                                                                                | GO:0046573 | 3    | 1  | 0.04  | + | 25.91 | 4.99E-02 | 1E+00    | 5DPI_iCoV2 + RIBI |
| <b>2,3-bisphosphoglycerate-dependent phosphoglycerate mutase activity</b>                                                       | GO:0046538 | 3    | 1  | 0.04  | + | 25.91 | 4.99E-02 | 1E+00    | 5DPI_iCoV2 + RIBI |
| <b>vitamin D 24-hydroxylase activity</b>                                                                                        | GO:0070576 | 3    | 1  | 0.04  | + | 25.91 | 4.99E-02 | 1E+00    | 5DPI_iCoV2 + RIBI |
| <b>interleukin-22 receptor activity</b>                                                                                         | GO:0042018 | 3    | 1  | 0.04  | + | 25.91 | 4.99E-02 | 1E+00    | 5DPI_iCoV2 + RIBI |
| <b>CCR10 chemokine receptor binding</b>                                                                                         | GO:0031735 | 3    | 1  | 0.04  | + | 25.91 | 4.99E-02 | 1E+00    | 5DPI_iCoV2 + RIBI |
| <b>glucose:proton symporter activity</b>                                                                                        | GO:0005356 | 3    | 1  | 0.04  | + | 25.91 | 4.99E-02 | 1E+00    | 5DPI_iCoV2 + RIBI |
| <b>norepinephrine:sodium symporter activity</b>                                                                                 | GO:0005334 | 3    | 1  | 0.04  | + | 25.91 | 4.99E-02 | 1E+00    | 5DPI_iCoV2 + RIBI |
| <b>hexose:proton symporter activity</b>                                                                                         | GO:0009679 | 3    | 1  | 0.04  | + | 25.91 | 4.99E-02 | 1E+00    | 5DPI_iCoV2 + RIBI |
| <b>acetylcholine transmembrane transporter activity</b>                                                                         | GO:0005277 | 3    | 1  | 0.04  | + | 25.91 | 4.99E-02 | 1E+00    | 5DPI_iCoV2 + RIBI |
| <b>L-glutamate uniporter activity</b>                                                                                           | GO:0140788 | 3    | 1  | 0.04  | + | 25.91 | 4.99E-02 | 1E+00    | 5DPI_iCoV2 + RIBI |
| <b>acetate ester transmembrane transporter activity</b>                                                                         | GO:1901375 | 3    | 1  | 0.04  | + | 25.91 | 4.99E-02 | 1E+00    | 5DPI_iCoV2 + RIBI |
| <b>cytokine activity</b>                                                                                                        | GO:0005125 | 231  | 28 | 2.36  | + | 11.85 | 9.15E-21 | 4.56E-17 | 5DPI_iCoV2 + Alum |
| <b>receptor ligand activity</b>                                                                                                 | GO:0048018 | 534  | 35 | 5.46  | + | 6.41  | 9.58E-18 | 2.39E-14 | 5DPI_iCoV2 + Alum |
| <b>chemokine activity</b>                                                                                                       | GO:0008009 | 42   | 15 | 0.43  | + | 34.92 | 1.14E-17 | 1.9E-14  | 5DPI_iCoV2 + Alum |
| <b>signaling receptor activator activity</b>                                                                                    | GO:0030546 | 545  | 35 | 5.57  | + | 6.28  | 1.74E-17 | 2.17E-14 | 5DPI_iCoV2 + Alum |
| <b>signaling receptor regulator activity</b>                                                                                    | GO:0030545 | 591  | 36 | 6.05  | + | 5.96  | 2.8E-17  | 2.8E-14  | 5DPI_iCoV2 + Alum |
| <b>chemokine receptor binding</b>                                                                                               | GO:0042379 | 79   | 15 | 0.81  | + | 18.56 | 3.46E-14 | 2.87E-11 | 5DPI_iCoV2 + Alum |
| <b>cytokine receptor binding</b>                                                                                                | GO:0005126 | 316  | 23 | 3.23  | + | 7.12  | 7.36E-13 | 5.25E-10 | 5DPI_iCoV2 + Alum |
| <b>molecular function regulator activity</b>                                                                                    | GO:0098772 | 2147 | 59 | 21.96 | + | 2.69  | 1.94E-12 | 1.21E-09 | 5DPI_iCoV2 + Alum |
| <b>molecular function activator activity</b>                                                                                    | GO:0140677 | 1192 | 41 | 12.19 | + | 3.36  | 1.43E-11 | 7.91E-09 | 5DPI_iCoV2 + Alum |
| <b>CCR chemokine receptor binding</b>                                                                                           | GO:0048020 | 58   | 11 | 0.59  | + | 18.54 | 9.78E-11 | 4.88E-08 | 5DPI_iCoV2 + Alum |
| <b>signaling receptor binding</b>                                                                                               | GO:0005102 | 1650 | 47 | 16.88 | + | 2.78  | 1.91E-10 | 8.68E-08 | 5DPI_iCoV2 + Alum |
| <b>G protein-coupled receptor binding</b>                                                                                       | GO:0001664 | 328  | 17 | 3.36  | + | 5.07  | 9.44E-08 | 3.93E-05 | 5DPI_iCoV2 + Alum |
| <b>endopeptidase activity</b>                                                                                                   | GO:0004175 | 453  | 19 | 4.63  | + | 4.1   | 3.79E-07 | 1.45E-04 | 5DPI_iCoV2 + Alum |
| <b>growth factor activity</b>                                                                                                   | GO:0008083 | 149  | 11 | 1.52  | + | 7.22  | 7.43E-07 | 2.65E-04 | 5DPI_iCoV2 + Alum |
| <b>serine-type endopeptidase activity</b>                                                                                       | GO:0004252 | 194  | 12 | 1.98  | + | 6.05  | 1.36E-06 | 4.52E-04 | 5DPI_iCoV2 + Alum |

|                                                   |            |      |    |       |   |       |          |          |                   |
|---------------------------------------------------|------------|------|----|-------|---|-------|----------|----------|-------------------|
| <b>serine-type peptidase activity</b>             | GO:0008236 | 211  | 12 | 2.16  | + | 5.56  | 3.1E-06  | 9.67E-04 | 5DPI_iCoV2 + Alum |
| <b>serine hydrolase activity</b>                  | GO:0017171 | 216  | 12 | 2.21  | + | 5.43  | 3.9E-06  | 1.14E-03 | 5DPI_iCoV2 + Alum |
| <b>peptidase activity</b>                         | GO:0008233 | 642  | 21 | 6.57  | + | 3.2   | 4.27E-06 | 1.18E-03 | 5DPI_iCoV2 + Alum |
| <b>peptidase regulator activity</b>               | GO:0061134 | 267  | 13 | 2.73  | + | 4.76  | 6.07E-06 | 1.59E-03 | 5DPI_iCoV2 + Alum |
| <b>endopeptidase regulator activity</b>           | GO:0061135 | 214  | 11 | 2.19  | + | 5.03  | 1.97E-05 | 4.93E-03 | 5DPI_iCoV2 + Alum |
| <b>CXCR chemokine receptor binding</b>            | GO:0045236 | 15   | 4  | 0.15  | + | 26.07 | 3.52E-05 | 8.37E-03 | 5DPI_iCoV2 + Alum |
| <b>endopeptidase inhibitor activity</b>           | GO:0004866 | 195  | 10 | 1.99  | + | 5.01  | 4.81E-05 | 1.09E-02 | 5DPI_iCoV2 + Alum |
| <b>carbohydrate binding</b>                       | GO:0030246 | 283  | 12 | 2.89  | + | 4.15  | 5.08E-05 | 1.1E-02  | 5DPI_iCoV2 + Alum |
| <b>peptidase inhibitor activity</b>               | GO:0030414 | 202  | 10 | 2.07  | + | 4.84  | 6.38E-05 | 1.33E-02 | 5DPI_iCoV2 + Alum |
| <b>CCR1 chemokine receptor binding</b>            | GO:0031726 | 7    | 3  | 0.07  | + | 41.9  | 1.17E-04 | 2.33E-02 | 5DPI_iCoV2 + Alum |
| <b>olfactory receptor activity</b>                | GO:0004984 | 1169 | 1  | 11.96 | - | 0.08  | 1.24E-04 | 2.38E-02 | 5DPI_iCoV2 + Alum |
| <b>chitin binding</b>                             | GO:0008061 | 11   | 3  | 0.11  | + | 26.66 | 3.43E-04 | 6.35E-02 | 5DPI_iCoV2 + Alum |
| <b>extracellular matrix binding</b>               | GO:0050840 | 57   | 5  | 0.58  | + | 8.58  | 4.12E-04 | 7.34E-02 | 5DPI_iCoV2 + Alum |
| <b>cytokine receptor activity</b>                 | GO:0004896 | 95   | 6  | 0.97  | + | 6.17  | 5.74E-04 | 9.88E-02 | 5DPI_iCoV2 + Alum |
| <b>purine ribonucleoside triphosphate binding</b> | GO:0035639 | 1733 | 5  | 17.73 | - | 0.28  | 6.28E-04 | 1.04E-01 | 5DPI_iCoV2 + Alum |
| <b>immune receptor activity</b>                   | GO:0140375 | 137  | 7  | 1.4   | + | 5     | 6.76E-04 | 1.09E-01 | 5DPI_iCoV2 + Alum |
| <b>fibronectin binding</b>                        | GO:0001968 | 36   | 4  | 0.37  | + | 10.86 | 7.03E-04 | 1.1E-01  | 5DPI_iCoV2 + Alum |
| <b>purine ribonucleotide binding</b>              | GO:0032555 | 1814 | 6  | 18.55 | - | 0.32  | 8.82E-04 | 1.33E-01 | 5DPI_iCoV2 + Alum |
| <b>collagen binding</b>                           | GO:0005518 | 70   | 5  | 0.72  | + | 6.98  | 9.88E-04 | 1.45E-01 | 5DPI_iCoV2 + Alum |
| <b>nucleotide binding</b>                         | GO:0000166 | 2079 | 8  | 21.27 | - | 0.38  | 1.18E-03 | 1.64E-01 | 5DPI_iCoV2 + Alum |
| <b>nucleoside phosphate binding</b>               | GO:1901265 | 2079 | 8  | 21.27 | - | 0.38  | 1.18E-03 | 1.68E-01 | 5DPI_iCoV2 + Alum |
| <b>arachidonate 12-lipoxygenase activity</b>      | GO:0004052 | 4    | 2  | 0.04  | + | 48.88 | 1.49E-03 | 1.91E-01 | 5DPI_iCoV2 + Alum |
| <b>linoleate 13S-lipoxygenase activity</b>        | GO:0016165 | 4    | 2  | 0.04  | + | 48.88 | 1.49E-03 | 1.96E-01 | 5DPI_iCoV2 + Alum |
| <b>arachidonate 15-lipoxygenase activity</b>      | GO:0050473 | 4    | 2  | 0.04  | + | 48.88 | 1.49E-03 | 2.01E-01 | 5DPI_iCoV2 + Alum |
| <b>metalloendopeptidase activity</b>              | GO:0004222 | 118  | 6  | 1.21  | + | 4.97  | 1.67E-03 | 2.08E-01 | 5DPI_iCoV2 + Alum |
| <b>RNA nuclease activity</b>                      | GO:0004540 | 121  | 6  | 1.24  | + | 4.85  | 1.88E-03 | 2.29E-01 | 5DPI_iCoV2 + Alum |
| <b>CCR3 chemokine receptor binding</b>            | GO:0031728 | 5    | 2  | 0.05  | + | 39.11 | 2.07E-03 | 2.46E-01 | 5DPI_iCoV2 + Alum |
| <b>ATP binding</b>                                | GO:0005524 | 1408 | 4  | 14.4  | - | 0.28  | 2.2E-03  | 2.55E-01 | 5DPI_iCoV2 + Alum |
| <b>ribonucleotide binding</b>                     | GO:0032553 | 1832 | 7  | 18.74 | - | 0.37  | 2.25E-03 | 2.56E-01 | 5DPI_iCoV2 + Alum |

|                                                                                                                                      |            |      |     |       |   |        |          |          |                   |
|--------------------------------------------------------------------------------------------------------------------------------------|------------|------|-----|-------|---|--------|----------|----------|-------------------|
| <b>protein binding</b>                                                                                                               | GO:0005515 | 9462 | 120 | 96.78 | + | 1.24   | 2.27E-03 | 2.51E-01 | 5DPI_iCoV2 + Alum |
| <b>enzyme regulator activity</b>                                                                                                     | GO:0030234 | 1285 | 25  | 13.14 | + | 1.9    | 2.4E-03  | 2.6E-01  | 5DPI_iCoV2 + Alum |
| <b>C-C chemokine receptor activity</b>                                                                                               | GO:0016493 | 24   | 3   | 0.25  | + | 12.22  | 2.5E-03  | 2.66E-01 | 5DPI_iCoV2 + Alum |
| <b>serine-type endopeptidase inhibitor activity</b>                                                                                  | GO:0004867 | 129  | 6   | 1.32  | + | 4.55   | 2.56E-03 | 2.66E-01 | 5DPI_iCoV2 + Alum |
| <b>chemokine receptor activity</b>                                                                                                   | GO:0004950 | 25   | 3   | 0.26  | + | 11.73  | 2.78E-03 | 2.72E-01 | 5DPI_iCoV2 + Alum |
| <b>C-C chemokine binding</b>                                                                                                         | GO:0019957 | 25   | 3   | 0.26  | + | 11.73  | 2.78E-03 | 2.78E-01 | 5DPI_iCoV2 + Alum |
| <b>G protein-coupled chemoattractant receptor activity</b>                                                                           | GO:0001637 | 25   | 3   | 0.26  | + | 11.73  | 2.78E-03 | 2.84E-01 | 5DPI_iCoV2 + Alum |
| <b>heterocyclic compound binding</b>                                                                                                 | GO:1901363 | 5371 | 36  | 54.94 | - | 0.66   | 2.91E-03 | 2.79E-01 | 5DPI_iCoV2 + Alum |
| <b>monosaccharide binding</b>                                                                                                        | GO:0048029 | 92   | 5   | 0.94  | + | 5.31   | 3.08E-03 | 2.85E-01 | 5DPI_iCoV2 + Alum |
| <b>oxidoreductase activity, acting on single donors with incorporation of molecular oxygen, incorporation of two atoms of oxygen</b> | GO:0016702 | 26   | 3   | 0.27  | + | 11.28  | 3.08E-03 | 2.9E-01  | 5DPI_iCoV2 + Alum |
| <b>hydrolase activity</b>                                                                                                            | GO:0016787 | 2363 | 39  | 24.17 | + | 1.61   | 3.29E-03 | 2.99E-01 | 5DPI_iCoV2 + Alum |
| <b>oxidoreductase activity, acting on single donors with incorporation of molecular oxygen</b>                                       | GO:0016701 | 27   | 3   | 0.28  | + | 10.86  | 3.4E-03  | 3.03E-01 | 5DPI_iCoV2 + Alum |
| <b>cytoskeletal protein binding</b>                                                                                                  | GO:0008092 | 1021 | 2   | 10.44 | - | 0.19   | 3.43E-03 | 3E-01    | 5DPI_iCoV2 + Alum |
| <b>CCR2 chemokine receptor binding</b>                                                                                               | GO:0031727 | 7    | 2   | 0.07  | + | 27.93  | 3.51E-03 | 3.02E-01 | 5DPI_iCoV2 + Alum |
| <b>enzyme inhibitor activity</b>                                                                                                     | GO:0004857 | 410  | 11  | 4.19  | + | 2.62   | 3.92E-03 | 3.31E-01 | 5DPI_iCoV2 + Alum |
| <b>purine nucleotide binding</b>                                                                                                     | GO:0017076 | 1924 | 8   | 19.68 | - | 0.41   | 3.97E-03 | 3.3E-01  | 5DPI_iCoV2 + Alum |
| <b>cytokine binding</b>                                                                                                              | GO:0019955 | 142  | 6   | 1.45  | + | 4.13   | 4.03E-03 | 3.3E-01  | 5DPI_iCoV2 + Alum |
| <b>dicarboxylic acid transmembrane transporter activity</b>                                                                          | GO:0005310 | 29   | 3   | 0.3   | + | 10.11  | 4.09E-03 | 3.29E-01 | 5DPI_iCoV2 + Alum |
| <b>adenyl ribonucleotide binding</b>                                                                                                 | GO:0032559 | 1479 | 5   | 15.13 | - | 0.33   | 4.35E-03 | 3.44E-01 | 5DPI_iCoV2 + Alum |
| <b>laminin binding</b>                                                                                                               | GO:0043236 | 30   | 3   | 0.31  | + | 9.78   | 4.47E-03 | 3.48E-01 | 5DPI_iCoV2 + Alum |
| <b>metallopeptidase activity</b>                                                                                                     | GO:0008237 | 198  | 7   | 2.03  | + | 3.46   | 5E-03    | 3.84E-01 | 5DPI_iCoV2 + Alum |
| <b>integrin binding</b>                                                                                                              | GO:0005178 | 152  | 6   | 1.55  | + | 3.86   | 5.53E-03 | 4.18E-01 | 5DPI_iCoV2 + Alum |
| <b>mannose binding</b>                                                                                                               | GO:0005537 | 33   | 3   | 0.34  | + | 8.89   | 5.72E-03 | 4.26E-01 | 5DPI_iCoV2 + Alum |
| <b>chemokine binding</b>                                                                                                             | GO:0019956 | 34   | 3   | 0.35  | + | 8.63   | 6.18E-03 | 4.53E-01 | 5DPI_iCoV2 + Alum |
| <b>solute:monoatomic cation symporter activity</b>                                                                                   | GO:0015294 | 113  | 5   | 1.16  | + | 4.33   | 7.06E-03 | 5.11E-01 | 5DPI_iCoV2 + Alum |
| <b>transferase activity</b>                                                                                                          | GO:0016740 | 2239 | 11  | 22.9  | - | 0.48   | 7.24E-03 | 5.16E-01 | 5DPI_iCoV2 + Alum |
| <b>odorant binding</b>                                                                                                               | GO:0005549 | 534  | 0   | 5.46  | - | < 0.01 | 7.33E-03 | 5.15E-01 | 5DPI_iCoV2 + Alum |

|                                                              |            |      |    |       |   |       |          |          |                   |
|--------------------------------------------------------------|------------|------|----|-------|---|-------|----------|----------|-------------------|
| <b>transition metal ion binding</b>                          | GO:0046914 | 989  | 19 | 10.12 | + | 1.88  | 8.99E-03 | 6.23E-01 | 5DPI_iCoV2 + Alum |
| <b>iron ion binding</b>                                      | GO:0005506 | 171  | 6  | 1.75  | + | 3.43  | 9.44E-03 | 6.46E-01 | 5DPI_iCoV2 + Alum |
| <b>poly-specific ribonuclease activity</b>                   | GO:0004535 | 13   | 2  | 0.13  | + | 15.04 | 9.83E-03 | 6.63E-01 | 5DPI_iCoV2 + Alum |
| <b>organic cyclic compound binding</b>                       | GO:0097159 | 5453 | 39 | 55.78 | - | 0.7   | 1.01E-02 | 6.75E-01 | 5DPI_iCoV2 + Alum |
| <b>water transmembrane transporter activity</b>              | GO:0005372 | 14   | 2  | 0.14  | + | 13.97 | 1.12E-02 | 7.33E-01 | 5DPI_iCoV2 + Alum |
| <b>chemoattractant activity</b>                              | GO:0042056 | 43   | 3  | 0.44  | + | 6.82  | 1.13E-02 | 7.22E-01 | 5DPI_iCoV2 + Alum |
| <b>heparin binding</b>                                       | GO:0008201 | 178  | 6  | 1.82  | + | 3.3   | 1.13E-02 | 7.32E-01 | 5DPI_iCoV2 + Alum |
| <b>C4-dicarboxylate transmembrane transporter activity</b>   | GO:0015556 | 15   | 2  | 0.15  | + | 13.04 | 1.26E-02 | 7.74E-01 | 5DPI_iCoV2 + Alum |
| <b>phospholipase activator activity</b>                      | GO:0016004 | 15   | 2  | 0.15  | + | 13.04 | 1.26E-02 | 7.83E-01 | 5DPI_iCoV2 + Alum |
| <b>1-phosphatidylinositol-3-kinase regulator activity</b>    | GO:0046935 | 15   | 2  | 0.15  | + | 13.04 | 1.26E-02 | 7.93E-01 | 5DPI_iCoV2 + Alum |
| <b>adenyl nucleotide binding</b>                             | GO:0030554 | 1588 | 7  | 16.24 | - | 0.43  | 1.32E-02 | 8.04E-01 | 5DPI_iCoV2 + Alum |
| <b>G protein-coupled amine receptor activity</b>             | GO:0008227 | 46   | 3  | 0.47  | + | 6.38  | 1.34E-02 | 8.06E-01 | 5DPI_iCoV2 + Alum |
| <b>icosanoid receptor activity</b>                           | GO:0004953 | 16   | 2  | 0.16  | + | 12.22 | 1.4E-02  | 8.34E-01 | 5DPI_iCoV2 + Alum |
| <b>G protein-coupled receptor activity</b>                   | GO:0004930 | 743  | 15 | 7.6   | + | 1.97  | 1.41E-02 | 8.3E-01  | 5DPI_iCoV2 + Alum |
| <b>hormone activity</b>                                      | GO:0005179 | 137  | 5  | 1.4   | + | 3.57  | 1.49E-02 | 8.65E-01 | 5DPI_iCoV2 + Alum |
| <b>insulin-like growth factor receptor binding</b>           | GO:0005159 | 17   | 2  | 0.17  | + | 11.5  | 1.56E-02 | 8.94E-01 | 5DPI_iCoV2 + Alum |
| <b>molecular function inhibitor activity</b>                 | GO:0140678 | 552  | 12 | 5.65  | + | 2.13  | 1.57E-02 | 8.91E-01 | 5DPI_iCoV2 + Alum |
| <b>calcium ion binding</b>                                   | GO:0005509 | 631  | 13 | 6.45  | + | 2.01  | 1.58E-02 | 8.85E-01 | 5DPI_iCoV2 + Alum |
| <b>lipase activator activity</b>                             | GO:0060229 | 19   | 2  | 0.19  | + | 10.29 | 1.89E-02 | 1E+00    | 5DPI_iCoV2 + Alum |
| <b>oligosaccharide binding</b>                               | GO:0070492 | 19   | 2  | 0.19  | + | 10.29 | 1.89E-02 | 1E+00    | 5DPI_iCoV2 + Alum |
| <b>nuclease activity</b>                                     | GO:0004518 | 202  | 6  | 2.07  | + | 2.9   | 1.95E-02 | 1E+00    | 5DPI_iCoV2 + Alum |
| <b>nucleic acid binding</b>                                  | GO:0003676 | 3371 | 22 | 34.48 | - | 0.64  | 1.96E-02 | 1E+00    | 5DPI_iCoV2 + Alum |
| <b>interleukin-13 receptor binding</b>                       | GO:0005144 | 1    | 1  | 0.01  | + | 97.76 | 2.01E-02 | 8.59E-01 | 5DPI_iCoV2 + Alum |
| <b>amidinotransferase activity</b>                           | GO:0015067 | 1    | 1  | 0.01  | + | 97.76 | 2.01E-02 | 8.67E-01 | 5DPI_iCoV2 + Alum |
| <b>glycine amidinotransferase activity</b>                   | GO:0015068 | 1    | 1  | 0.01  | + | 97.76 | 2.01E-02 | 8.74E-01 | 5DPI_iCoV2 + Alum |
| <b>hepoxilin-epoxide hydrolase activity</b>                  | GO:0047977 | 1    | 1  | 0.01  | + | 97.76 | 2.01E-02 | 8.82E-01 | 5DPI_iCoV2 + Alum |
| <b>amino-acid betaine transmembrane transporter activity</b> | GO:0015199 | 1    | 1  | 0.01  | + | 97.76 | 2.01E-02 | 8.9E-01  | 5DPI_iCoV2 + Alum |
| <b>NADPH phosphatase activity</b>                            | GO:0102757 | 1    | 1  | 0.01  | + | 97.76 | 2.01E-02 | 8.98E-01 | 5DPI_iCoV2 + Alum |
| <b>C5a anaphylatoxin chemotactic receptor binding</b>        | GO:0031714 | 1    | 1  | 0.01  | + | 97.76 | 2.01E-02 | 9.06E-01 | 5DPI_iCoV2 + Alum |

|                                                                                                                |            |     |    |      |   |       |          |          |                   |
|----------------------------------------------------------------------------------------------------------------|------------|-----|----|------|---|-------|----------|----------|-------------------|
| <b>C5L2 anaphylatoxin chemotactic receptor binding</b>                                                         | GO:0031715 | 1   | 1  | 0.01 | + | 97.76 | 2.01E-02 | 9.14E-01 | 5DPI_iCoV2 + Alum |
| <b>CCR4 chemokine receptor binding</b>                                                                         | GO:0031729 | 1   | 1  | 0.01 | + | 97.76 | 2.01E-02 | 9.23E-01 | 5DPI_iCoV2 + Alum |
| <b>galactose:sodium symporter activity</b>                                                                     | GO:0015371 | 1   | 1  | 0.01 | + | 97.76 | 2.01E-02 | 9.31E-01 | 5DPI_iCoV2 + Alum |
| <b>high-affinity IgE receptor activity</b>                                                                     | GO:0019768 | 1   | 1  | 0.01 | + | 97.76 | 2.01E-02 | 9.4E-01  | 5DPI_iCoV2 + Alum |
| <b>acetylgalactosaminyl-O-glycosyl-glycoprotein beta-1,6-N-acetylglucosaminyltransferase activity</b>          | GO:0047225 | 1   | 1  | 0.01 | + | 97.76 | 2.01E-02 | 9.49E-01 | 5DPI_iCoV2 + Alum |
| <b>acetylgalactosaminyl-O-glycosyl-seryl-glycoprotein beta-1,6-N-acetylglucosaminyltransferase activity</b>    | GO:0106325 | 1   | 1  | 0.01 | + | 97.76 | 2.01E-02 | 9.58E-01 | 5DPI_iCoV2 + Alum |
| <b>acetylgalactosaminyl-O-glycosyl-threonyl-glycoprotein beta-1,6-N-acetylglucosaminyltransferase activity</b> | GO:0106326 | 1   | 1  | 0.01 | + | 97.76 | 2.01E-02 | 9.67E-01 | 5DPI_iCoV2 + Alum |
| <b>cholesterol 25-hydroxylase activity</b>                                                                     | GO:0001567 | 1   | 1  | 0.01 | + | 97.76 | 2.01E-02 | 9.76E-01 | 5DPI_iCoV2 + Alum |
| <b>all-trans retinoic acid 18-hydroxylase activity</b>                                                         | GO:0062183 | 1   | 1  | 0.01 | + | 97.76 | 2.01E-02 | 9.86E-01 | 5DPI_iCoV2 + Alum |
| <b>interleukin-33 receptor binding</b>                                                                         | GO:0002112 | 1   | 1  | 0.01 | + | 97.76 | 2.01E-02 | 9.96E-01 | 5DPI_iCoV2 + Alum |
| <b>propane-1,3-diamine oxidase activity</b>                                                                    | GO:0052600 | 1   | 1  | 0.01 | + | 97.76 | 2.01E-02 | 1E+00    | 5DPI_iCoV2 + Alum |
| <b>aconitate decarboxylase activity</b>                                                                        | GO:0047613 | 1   | 1  | 0.01 | + | 97.76 | 2.01E-02 | 1E+00    | 5DPI_iCoV2 + Alum |
| <b>NADP phosphatase activity</b>                                                                               | GO:0019178 | 1   | 1  | 0.01 | + | 97.76 | 2.01E-02 | 1E+00    | 5DPI_iCoV2 + Alum |
| <b>methylputrescine oxidase activity</b>                                                                       | GO:0052599 | 1   | 1  | 0.01 | + | 97.76 | 2.01E-02 | 1E+00    | 5DPI_iCoV2 + Alum |
| <b>histamine oxidase activity</b>                                                                              | GO:0052598 | 1   | 1  | 0.01 | + | 97.76 | 2.01E-02 | 1E+00    | 5DPI_iCoV2 + Alum |
| <b>G protein-coupled bile acid receptor activity</b>                                                           | GO:0038182 | 1   | 1  | 0.01 | + | 97.76 | 2.01E-02 | 1E+00    | 5DPI_iCoV2 + Alum |
| <b>interleukin-33 binding</b>                                                                                  | GO:0002113 | 1   | 1  | 0.01 | + | 97.76 | 2.01E-02 | 1E+00    | 5DPI_iCoV2 + Alum |
| <b>salt transmembrane transporter activity</b>                                                                 | GO:1901702 | 582 | 12 | 5.95 | + | 2.02  | 2.05E-02 | 8.69E-01 | 5DPI_iCoV2 + Alum |
| <b>phosphatidylinositol 3-kinase regulator activity</b>                                                        | GO:0035014 | 20  | 2  | 0.2  | + | 9.78  | 2.06E-02 | 8.66E-01 | 5DPI_iCoV2 + Alum |
| <b>symporter activity</b>                                                                                      | GO:0015293 | 150 | 5  | 1.53 | + | 3.26  | 2.09E-02 | 8.71E-01 | 5DPI_iCoV2 + Alum |
| <b>growth factor receptor binding</b>                                                                          | GO:0070851 | 151 | 5  | 1.54 | + | 3.24  | 2.15E-02 | 8.78E-01 | 5DPI_iCoV2 + Alum |
| <b>monooxygenase activity</b>                                                                                  | GO:0004497 | 151 | 5  | 1.54 | + | 3.24  | 2.15E-02 | 8.86E-01 | 5DPI_iCoV2 + Alum |
| <b>G protein-coupled serotonin receptor activity</b>                                                           | GO:0004993 | 22  | 2  | 0.23 | + | 8.89  | 2.43E-02 | 9.87E-01 | 5DPI_iCoV2 + Alum |
| <b>carboxylic acid binding</b>                                                                                 | GO:0031406 | 217 | 6  | 2.22 | + | 2.7   | 2.64E-02 | 1E+00    | 5DPI_iCoV2 + Alum |
| <b>heme binding</b>                                                                                            | GO:0020037 | 160 | 5  | 1.64 | + | 3.06  | 2.65E-02 | 1E+00    | 5DPI_iCoV2 + Alum |
| <b>serotonin receptor activity</b>                                                                             | GO:0099589 | 24  | 2  | 0.25 | + | 8.15  | 2.83E-02 | 1E+00    | 5DPI_iCoV2 + Alum |

|                                                                                                              |            |     |   |      |   |       |          |       |                   |
|--------------------------------------------------------------------------------------------------------------|------------|-----|---|------|---|-------|----------|-------|-------------------|
| <b>granulocyte colony-stimulating factor receptor binding</b>                                                | GO:0005130 | 2   | 1 | 0.02 | + | 48.88 | 3.01E-02 | 1E+00 | 5DPI_iCoV2 + Alum |
| <b>1-propan-2-amine binding</b>                                                                              | GO:0071886 | 2   | 1 | 0.02 | + | 48.88 | 3.01E-02 | 1E+00 | 5DPI_iCoV2 + Alum |
| <b>prostacyclin receptor activity</b>                                                                        | GO:0016501 | 2   | 1 | 0.02 | + | 48.88 | 3.01E-02 | 1E+00 | 5DPI_iCoV2 + Alum |
| <b>activin receptor antagonist activity</b>                                                                  | GO:0038102 | 2   | 1 | 0.02 | + | 48.88 | 3.01E-02 | 1E+00 | 5DPI_iCoV2 + Alum |
| <b>folic acid receptor activity</b>                                                                          | GO:0061714 | 2   | 1 | 0.02 | + | 48.88 | 3.01E-02 | 1E+00 | 5DPI_iCoV2 + Alum |
| <b>interleukin-33 receptor activity</b>                                                                      | GO:0002114 | 2   | 1 | 0.02 | + | 48.88 | 3.01E-02 | 1E+00 | 5DPI_iCoV2 + Alum |
| <b>leukotriene B4 receptor activity</b>                                                                      | GO:0001632 | 2   | 1 | 0.02 | + | 48.88 | 3.01E-02 | 1E+00 | 5DPI_iCoV2 + Alum |
| <b>inorganic diphosphate transmembrane transporter activity</b>                                              | GO:0030504 | 2   | 1 | 0.02 | + | 48.88 | 3.01E-02 | 1E+00 | 5DPI_iCoV2 + Alum |
| <b>long-chain-alcohol O-fatty-acyltransferase activity</b>                                                   | GO:0047196 | 2   | 1 | 0.02 | + | 48.88 | 3.01E-02 | 1E+00 | 5DPI_iCoV2 + Alum |
| <b>arginase activity</b>                                                                                     | GO:0004053 | 2   | 1 | 0.02 | + | 48.88 | 3.01E-02 | 1E+00 | 5DPI_iCoV2 + Alum |
| <b>cholesterol monooxygenase activity</b>                                                                    | GO:0008386 | 2   | 1 | 0.02 | + | 48.88 | 3.01E-02 | 1E+00 | 5DPI_iCoV2 + Alum |
| <b>arachidoyl-CoA:1-dodecanol O-acyltransferase activity</b>                                                 | GO:0102966 | 2   | 1 | 0.02 | + | 48.88 | 3.01E-02 | 1E+00 | 5DPI_iCoV2 + Alum |
| <b>fructose 1,6-bisphosphate 1-phosphatase activity</b>                                                      | GO:0042132 | 2   | 1 | 0.02 | + | 48.88 | 3.01E-02 | 1E+00 | 5DPI_iCoV2 + Alum |
| <b>phosphatidylinositol-3,4,5-trisphosphate 5-phosphatase activity</b>                                       | GO:0034485 | 2   | 1 | 0.02 | + | 48.88 | 3.01E-02 | 1E+00 | 5DPI_iCoV2 + Alum |
| <b>N-acetyllactosaminide beta-1,6-N-acetylglucosaminyltransferase activity</b>                               | GO:0008109 | 2   | 1 | 0.02 | + | 48.88 | 3.01E-02 | 1E+00 | 5DPI_iCoV2 + Alum |
| <b>alpha-2C adrenergic receptor binding</b>                                                                  | GO:0031696 | 2   | 1 | 0.02 | + | 48.88 | 3.01E-02 | 1E+00 | 5DPI_iCoV2 + Alum |
| <b>alpha-glucoside transmembrane transporter activity</b>                                                    | GO:0015151 | 2   | 1 | 0.02 | + | 48.88 | 3.01E-02 | 1E+00 | 5DPI_iCoV2 + Alum |
| <b>hepoxilin A3 synthase activity</b>                                                                        | GO:0051120 | 2   | 1 | 0.02 | + | 48.88 | 3.01E-02 | 1E+00 | 5DPI_iCoV2 + Alum |
| <b>lactoperoxidase activity</b>                                                                              | GO:0140825 | 2   | 1 | 0.02 | + | 48.88 | 3.01E-02 | 1E+00 | 5DPI_iCoV2 + Alum |
| <b>oncostatin-M receptor binding</b>                                                                         | GO:0005147 | 2   | 1 | 0.02 | + | 48.88 | 3.01E-02 | 1E+00 | 5DPI_iCoV2 + Alum |
| <b>interleukin-5 receptor binding</b>                                                                        | GO:0005137 | 2   | 1 | 0.02 | + | 48.88 | 3.01E-02 | 1E+00 | 5DPI_iCoV2 + Alum |
| <b>tetrapyrrole binding</b>                                                                                  | GO:0046906 | 169 | 5 | 1.73 | + | 2.89  | 3.23E-02 | 1E+00 | 5DPI_iCoV2 + Alum |
| <b>peptidase activator activity</b>                                                                          | GO:0016504 | 66  | 3 | 0.68 | + | 4.44  | 3.29E-02 | 1E+00 | 5DPI_iCoV2 + Alum |
| <b>active monoatomic ion transmembrane transporter activity</b>                                              | GO:0022853 | 229 | 6 | 2.34 | + | 2.56  | 3.29E-02 | 1E+00 | 5DPI_iCoV2 + Alum |
| <b>oxidoreductase activity, acting on paired donors, with incorporation or reduction of molecular oxygen</b> | GO:0016705 | 229 | 6 | 2.34 | + | 2.56  | 3.29E-02 | 1E+00 | 5DPI_iCoV2 + Alum |
| <b>carboxylic acid transmembrane transporter activity</b>                                                    | GO:0046943 | 170 | 5 | 1.74 | + | 2.88  | 3.3E-02  | 1E+00 | 5DPI_iCoV2 + Alum |

|                                                                                                      |            |     |    |      |   |        |          |       |                   |
|------------------------------------------------------------------------------------------------------|------------|-----|----|------|---|--------|----------|-------|-------------------|
| <b>organic acid transmembrane transporter activity</b>                                               | GO:0005342 | 171 | 5  | 1.75 | + | 2.86   | 3.37E-02 | 1E+00 | 5DPI_iCoV2 + Alum |
| <b>organic acid binding</b>                                                                          | GO:0043177 | 233 | 6  | 2.38 | + | 2.52   | 3.52E-02 | 1E+00 | 5DPI_iCoV2 + Alum |
| <b>sulfur compound binding</b>                                                                       | GO:1901681 | 297 | 7  | 3.04 | + | 2.3    | 3.57E-02 | 1E+00 | 5DPI_iCoV2 + Alum |
| <b>tubulin binding</b>                                                                               | GO:0015631 | 385 | 0  | 3.94 | - | < 0.01 | 3.62E-02 | 1E+00 | 5DPI_iCoV2 + Alum |
| <b>bicarbonate transmembrane transporter activity</b>                                                | GO:0015106 | 28  | 2  | 0.29 | + | 6.98   | 3.69E-02 | 1E+00 | 5DPI_iCoV2 + Alum |
| <b>L-amino acid transmembrane transporter activity</b>                                               | GO:0015179 | 70  | 3  | 0.72 | + | 4.19   | 3.8E-02  | 1E+00 | 5DPI_iCoV2 + Alum |
| <b>amino acid:monoatomic cation symporter activity</b>                                               | GO:0005416 | 29  | 2  | 0.3  | + | 6.74   | 3.92E-02 | 1E+00 | 5DPI_iCoV2 + Alum |
| <b>glycosaminoglycan binding</b>                                                                     | GO:0005539 | 240 | 6  | 2.45 | + | 2.44   | 3.96E-02 | 1E+00 | 5DPI_iCoV2 + Alum |
| <b>chondroitin 4-sulfotransferase activity</b>                                                       | GO:0047756 | 3   | 1  | 0.03 | + | 32.59  | 3.99E-02 | 1E+00 | 5DPI_iCoV2 + Alum |
| <b>C-4 methylsterol oxidase activity</b>                                                             | GO:0000254 | 3   | 1  | 0.03 | + | 32.59  | 3.99E-02 | 1E+00 | 5DPI_iCoV2 + Alum |
| <b>Toll-like receptor 4 binding</b>                                                                  | GO:0035662 | 3   | 1  | 0.03 | + | 32.59  | 3.99E-02 | 1E+00 | 5DPI_iCoV2 + Alum |
| <b>nitric-oxide synthase activity</b>                                                                | GO:0004517 | 3   | 1  | 0.03 | + | 32.59  | 3.99E-02 | 1E+00 | 5DPI_iCoV2 + Alum |
| <b>dopamine beta-monooxygenase activity</b>                                                          | GO:0004500 | 3   | 1  | 0.03 | + | 32.59  | 3.99E-02 | 1E+00 | 5DPI_iCoV2 + Alum |
| <b>bile acid receptor activity</b>                                                                   | GO:0038181 | 3   | 1  | 0.03 | + | 32.59  | 3.99E-02 | 1E+00 | 5DPI_iCoV2 + Alum |
| <b>beta-1,3-galactosyl-O-glycosyl-glycoprotein beta-1,6-N-acetylglucosaminyltransferase activity</b> | GO:0003829 | 3   | 1  | 0.03 | + | 32.59  | 3.99E-02 | 1E+00 | 5DPI_iCoV2 + Alum |
| <b>Gq/11-coupled serotonin receptor activity</b>                                                     | GO:0001587 | 3   | 1  | 0.03 | + | 32.59  | 3.99E-02 | 1E+00 | 5DPI_iCoV2 + Alum |
| <b>tetrahydrobiopterin binding</b>                                                                   | GO:0034617 | 3   | 1  | 0.03 | + | 32.59  | 3.99E-02 | 1E+00 | 5DPI_iCoV2 + Alum |
| <b>type II activin receptor binding</b>                                                              | GO:0070699 | 3   | 1  | 0.03 | + | 32.59  | 3.99E-02 | 1E+00 | 5DPI_iCoV2 + Alum |
| <b>alpha2-adrenergic receptor activity</b>                                                           | GO:0004938 | 3   | 1  | 0.03 | + | 32.59  | 3.99E-02 | 1E+00 | 5DPI_iCoV2 + Alum |
| <b>iodide transmembrane transporter activity</b>                                                     | GO:0015111 | 3   | 1  | 0.03 | + | 32.59  | 3.99E-02 | 1E+00 | 5DPI_iCoV2 + Alum |
| <b>tryptophan 2,3-dioxygenase activity</b>                                                           | GO:0004833 | 3   | 1  | 0.03 | + | 32.59  | 3.99E-02 | 1E+00 | 5DPI_iCoV2 + Alum |
| <b>sodium:dicarboxylate symporter activity</b>                                                       | GO:0017153 | 3   | 1  | 0.03 | + | 32.59  | 3.99E-02 | 1E+00 | 5DPI_iCoV2 + Alum |
| <b>glucoside transmembrane transporter activity</b>                                                  | GO:0042947 | 3   | 1  | 0.03 | + | 32.59  | 3.99E-02 | 1E+00 | 5DPI_iCoV2 + Alum |
| <b>interleukin-4 receptor binding</b>                                                                | GO:0005136 | 3   | 1  | 0.03 | + | 32.59  | 3.99E-02 | 1E+00 | 5DPI_iCoV2 + Alum |
| <b>cell adhesion molecule binding</b>                                                                | GO:0050839 | 305 | 7  | 3.12 | + | 2.24   | 4.02E-02 | 1E+00 | 5DPI_iCoV2 + Alum |
| <b>3'-5'-RNA exonuclease activity</b>                                                                | GO:0000175 | 30  | 2  | 0.31 | + | 6.52   | 4.15E-02 | 1E+00 | 5DPI_iCoV2 + Alum |
| <b>organic anion transmembrane transporter activity</b>                                              | GO:0008514 | 243 | 6  | 2.49 | + | 2.41   | 4.16E-02 | 1E+00 | 5DPI_iCoV2 + Alum |
| <b>inorganic molecular entity transmembrane transporter activity</b>                                 | GO:0015318 | 651 | 12 | 6.66 | + | 1.8    | 4.66E-02 | 1E+00 | 5DPI_iCoV2 + Alum |



|                                                                                                                                                                                       |            |    |   |      |   |       |          |       |                   |
|---------------------------------------------------------------------------------------------------------------------------------------------------------------------------------------|------------|----|---|------|---|-------|----------|-------|-------------------|
| <b>RNA exonuclease activity, producing 5'-phosphomonoesters</b>                                                                                                                       | GO:0016896 | 33 | 2 | 0.34 | + | 5.93  | 4.88E-02 | 1E+00 | 5DPI_iCoV2 + Alum |
| <b>protein-RNA adaptor activity</b>                                                                                                                                                   | GO:0140517 | 4  | 1 | 0.04 | + | 24.44 | 4.96E-02 | 1E+00 | 5DPI_iCoV2 + Alum |
| <b>diamine oxidase activity</b>                                                                                                                                                       | GO:0052597 | 4  | 1 | 0.04 | + | 24.44 | 4.96E-02 | 1E+00 | 5DPI_iCoV2 + Alum |
| <b>L-lactate dehydrogenase activity</b>                                                                                                                                               | GO:0004459 | 4  | 1 | 0.04 | + | 24.44 | 4.96E-02 | 1E+00 | 5DPI_iCoV2 + Alum |
| <b>palmitoyl-CoA 9-desaturase activity</b>                                                                                                                                            | GO:0032896 | 4  | 1 | 0.04 | + | 24.44 | 4.96E-02 | 1E+00 | 5DPI_iCoV2 + Alum |
| <b>N-acetyl-beta-D-galactosaminidase activity</b>                                                                                                                                     | GO:0102148 | 4  | 1 | 0.04 | + | 24.44 | 4.96E-02 | 1E+00 | 5DPI_iCoV2 + Alum |
| <b>amylin receptor activity</b>                                                                                                                                                       | GO:0097643 | 4  | 1 | 0.04 | + | 24.44 | 4.96E-02 | 1E+00 | 5DPI_iCoV2 + Alum |
| <b>group III metabotropic glutamate receptor activity</b>                                                                                                                             | GO:0001642 | 4  | 1 | 0.04 | + | 24.44 | 4.96E-02 | 1E+00 | 5DPI_iCoV2 + Alum |
| <b>adrenomedullin receptor activity</b>                                                                                                                                               | GO:0001605 | 4  | 1 | 0.04 | + | 24.44 | 4.96E-02 | 1E+00 | 5DPI_iCoV2 + Alum |
| <b>histone acetyltransferase regulator activity</b>                                                                                                                                   | GO:0035034 | 4  | 1 | 0.04 | + | 24.44 | 4.96E-02 | 1E+00 | 5DPI_iCoV2 + Alum |
| <b>norepinephrine binding</b>                                                                                                                                                         | GO:0051380 | 4  | 1 | 0.04 | + | 24.44 | 4.96E-02 | 1E+00 | 5DPI_iCoV2 + Alum |
| <b>urea channel activity</b>                                                                                                                                                          | GO:0015265 | 4  | 1 | 0.04 | + | 24.44 | 4.96E-02 | 1E+00 | 5DPI_iCoV2 + Alum |
| <b>glycerol channel activity</b>                                                                                                                                                      | GO:0015254 | 4  | 1 | 0.04 | + | 24.44 | 4.96E-02 | 1E+00 | 5DPI_iCoV2 + Alum |
| <b>leukotriene receptor activity</b>                                                                                                                                                  | GO:0004974 | 4  | 1 | 0.04 | + | 24.44 | 4.96E-02 | 1E+00 | 5DPI_iCoV2 + Alum |
| <b>tricarboxylic acid transmembrane transporter activity</b>                                                                                                                          | GO:0015142 | 4  | 1 | 0.04 | + | 24.44 | 4.96E-02 | 1E+00 | 5DPI_iCoV2 + Alum |
| <b>citrate transmembrane transporter activity</b>                                                                                                                                     | GO:0015137 | 4  | 1 | 0.04 | + | 24.44 | 4.96E-02 | 1E+00 | 5DPI_iCoV2 + Alum |
| <b>oxidoreductase activity, acting on paired donors, with incorporation or reduction of molecular oxygen, reduced ascorbate as one donor, and incorporation of one atom of oxygen</b> | GO:0016715 | 4  | 1 | 0.04 | + | 24.44 | 4.96E-02 | 1E+00 | 5DPI_iCoV2 + Alum |
